# 1 Proteases as Biological Bits for Programmable Medicine

2  
3 Brandon Alexander Holt<sup>1</sup> & Gabriel A. Kwong<sup>1–5,\*</sup>

4 <sup>1</sup> Wallace H. Coulter Department of Biomedical Engineering, Georgia Tech College of Engineering and Emory School of  
5 Medicine, Atlanta, GA 30332, USA.

6 <sup>2</sup> Parker H. Petit Institute of Bioengineering and Bioscience, Atlanta, GA 30332, USA.

7 <sup>3</sup> Institute for Electronics and Nanotechnology, Georgia Tech, Atlanta, GA 30332.

8 <sup>4</sup> Integrated Cancer Research Center, Georgia Tech, Atlanta, GA 30332.

9 <sup>5</sup> The Georgia Immunoengineering Consortium, Emory University and Georgia Tech, Atlanta, GA 30332.

10 \*Correspondence to: G.A.K., [gkwong@gatech.edu](mailto:gkwong@gatech.edu)

## 11 **Abstract:**

12 Engineered biocircuits that interface with living systems as plug-and-play constructs may enable  
13 new applications for programmable therapies and diagnostics. We create biological bits (bbits)  
14 using proteases – a family of pleiotropic, promiscuous enzymes – to construct the biological  
15 equivalent of Boolean logic gates, comparators and analog-to-digital converters. We use these  
16 modules to write a cell-free bioprogram that can combine with bacteria-infected blood, quantify  
17 infection burden, and then calculate and unlock a selective drug dose. Inspired by probabilistic  
18 computing, we leverage multi- and common-target protease promiscuity as the biological analog  
19 of superposition to program three probabilistic bbits that solve all implementations of the two-bit  
20 oracle problem, Learning Parity with Noise. Treating a network of dysregulated proteases in a  
21 living animal as an oracle, we use this algorithm to resolve the probability distribution of  
22 coagulation proteases *in vivo*, allowing diagnosis of pulmonary embolism with high sensitivity and  
23 specificity (AUROC = 0.92) in a mouse model of thrombosis. Our results demonstrate that  
24 protease activity can be programmed in cell-free systems to carry out classical and probabilistic  
25 algorithms for programmable medicine.  
26

## 1 Introduction

2 Rapid advances in engineered biological circuits are motivating the design of new  
3 treatment and detection platforms for practical applications in programmable medicine. The  
4 development of foundational components, such as molecular logic gates<sup>1</sup> and genetic clocks<sup>2,3</sup>,  
5 have enabled the design of biocircuits with increasing complexity, including the ability to solve  
6 mathematical problems<sup>4</sup>, build autonomous robots<sup>5</sup>, and play interactive games<sup>6</sup>. Recently,  
7 programmable biocircuits have been applied for therapeutic and diagnostic applications<sup>7</sup>,  
8 including genetic circuits that sense-and-respond to dysregulated inflammation<sup>8</sup> or blood glucose  
9 levels<sup>9</sup>. To date, the design of these biocircuits is principally focused on constructs that are  
10 implemented in cell-based platforms – which require genome or protein engineering<sup>10-13</sup> – and  
11 carry out algorithms inspired by classical computer circuits, which operate on binary digits (bits)  
12 and Boolean logic gates (e.g., AND, OR, NAND).

13 While classical biocircuits are well-suited at performing deterministic tasks (e.g., input  
14 determines output)<sup>14</sup>, the ability to perform inference-based tasks – such as identification of which  
15 single input cause resulted in the observed output effect given multiple plausible inputs – are more  
16 challenging. In contrast to classical circuits, probabilistic circuits, which operate on analog bits  
17 characterized by a probability distribution of states, efficiently solve inference problems by  
18 assigning a likelihood probability that each plausible input would produce the observed output<sup>15</sup>.  
19 Probabilistic bits have been implemented with magnets (p-bits)<sup>16-18</sup> as well as photons and  
20 electrons in quantum systems (qubits)<sup>19,20</sup>. In medicine, differential diagnoses are fundamentally  
21 based on inference, wherein an observed symptom could be caused by several diseases.  
22 Conversely, the decision to treat a patient is determined by a clear set of inputs (e.g., disease stage,  
23 biomarker level, etc.)<sup>7</sup>. For these reasons, we sought to develop a unified system of biological bits

1 capable of executing both classical and probabilistic algorithms for therapeutic and diagnostic  
2 applications.

3 In living organisms, high-level functions arise from intricate networks of enzymatic  
4 activity that ultimately control complex systems ranging from immunity to blood homeostasis<sup>21-</sup>  
5 <sup>24</sup>. Among enzymes, proteases are both ubiquitous, comprising 2% of the human genome<sup>25</sup>, and  
6 promiscuous, having the ability to cleave diverse substrate sequences (6–8 AA) in addition to their  
7 putative target<sup>26-33</sup>. To leverage these features for programmable medicine, we define protease  
8 activity acting on a target substrate as a biological bit (bbit). Under a classical framework, a register  
9 of bbits comprise distinct protease-substrate pairs that take on the binary state 1 above an activity  
10 threshold (**Fig. 1A left., Fig. S1A**). By contrast, probabilistic bbits are constructed using  
11 promiscuous proteases that act on two substrates simultaneously to create a state of superposition  
12 where the probability of being measured in state 0 or 1 is based on relative substrate cleavage  
13 velocities ( $v_0$  and  $v_1$ ) (**Fig. 1A right, Fig. S1B**). Here we use classical bbits to design a plug-and-  
14 play therapeutic biocircuit capable of quantifying input bacterial activity and outputting a digital  
15 drug dose to clear infected human blood (**Fig 1B**). Under a probabilistic framework, we construct  
16 diagnostic biocircuits using probability-based gates to first solve the oracle problem Learning  
17 Parity with Noise (LPN), and then extend this system *in vivo* by treating networks of dysregulated  
18 proteases as a hidden oracle to noninvasively diagnose pulmonary embolism with high accuracy  
19 in a mouse model of thrombosis (**Fig 1C**).

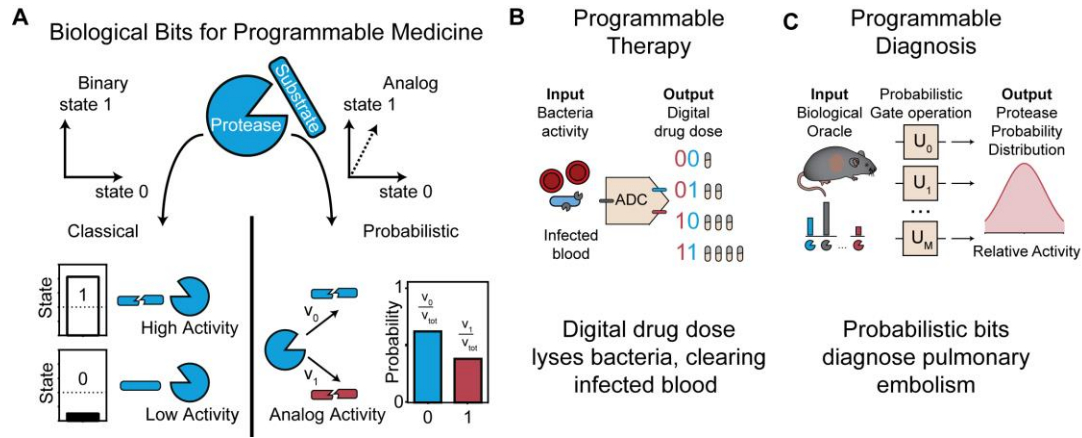

**Figure 1. Protease activity as classical or probabilistic biological bits for programmable medicine.** (A) (left) The binary state of a classical bit represented as two orthogonal states (0 or 1). A classical bbit exists in a state of either high or low protease activity, defined by a threshold (dotted line). (right) The binary state of probabilistic bits represented as a superposed vector between state 0 and state 1. A probabilistic bbit acting on two state substrates has two cleavage velocities ( $v_0$  and  $v_1$ ), which are the probabilities of observing the bbit in either state (0 or 1). (B) Binary biological bits are applied to construct a therapeutic biocircuit for digital drug delivery to clear infected blood of bacteria. (C) Probabilistic biological bits are applied to construct a noninvasive diagnostic that detects pulmonary embolism in living mice.

## Results

A central function of complex circuits is the ability to store and manipulate digitized information; therefore, we first set out to construct a flash analog-to-digital converter (ADC) to convert continuous biological signals into binary digits. An electronic ADC performs three major operations during signal conversion: voltage comparison, priority assignment, and digital encoding. An analog input voltage is first compared against a set of increasing reference voltages ( $V_0$ – $V_i$ ) by individual comparators ( $d_0$ – $d_i$ ) that allows current to pass if the input signal is greater than or equal to its reference value (Fig. S2). During priority assignment, only the activated comparator with the highest reference voltage,  $d_n$ , remains on while all other activated

1 comparators,  $d_{n-1}$ – $d_0$  are turned off. The prioritized signal is then fed into a digital encoder  
2 comprising OR gates to produce binary values. To design an ADC biocircuit using protease  
3 activity as the core signal, we constructed biological analogs of comparators by using liposomes  
4 locked by an outer peptide cage<sup>34,35</sup> (**Fig. 2A; Fig. S3A, B**). With increasing peptide crosslinking  
5 densities, these biocomparators ( $b_0$ – $b_i$ ) served to reference the level of input protease activity  
6 (GzmB) required to fully degrade the peptide cage (IEFDSGK, **Table S1**) and expose the lipid  
7 core (**Fig. S3C**), analogous to the reference voltages stored in electronic comparators. We used  
8 lipase<sup>36</sup> as a Buffer gate to open all biocomparators with fully degraded cages (**Fig. 2B, C; Fig.**  
9 **S4**) and release a unique combination of inhibitors and signal proteases (WNV, TEV, and WNV  
10 inhibitor) that collectively act to assign priority to the highest activated biocomparator ( $b_n$ ) by  
11 inhibiting all signal proteases released from other biocomparators ( $b_0$ – $b_{n-1}$ ). To encode the  
12 prioritized signal into binary values, we designed a set of OR gates using orthogonal quenched  
13 substrates (RTKR and ENLYFQG) specific for the signal proteases (WNV and TEV respectively;  
14 **Fig. 2D**) to provide fluorescent 2-bit readouts ( $p_0$ – $p_i$ ; **Fig. S5**). Fully integrated, our 4-2 bit  
15 biological ADC converted input protease levels (GzmB) across four orders of magnitude into  
16 binary digital outputs (**Fig. 2E, F**).

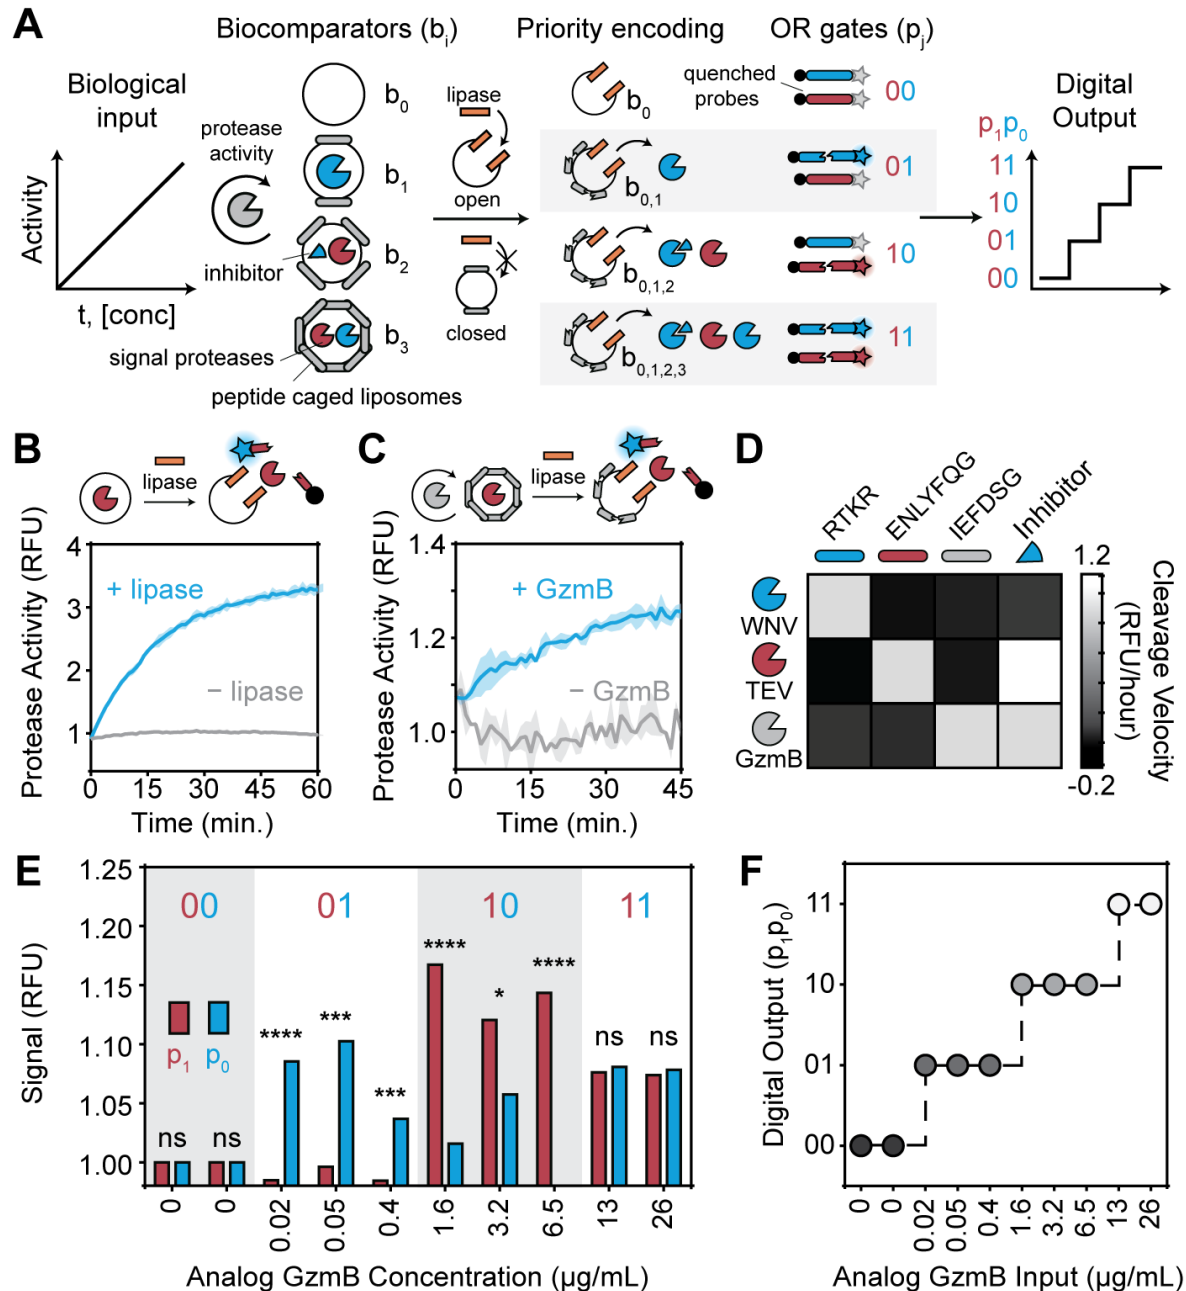

1

2

3

4

5

6

7

**Figure 2. A biological ADC transduces protease activity to classical bits.** (A) Biocircuit diagram depicting the conversion of a biological input (protease activity) into a digital output with biocomparators, buffer gates, and OR gates. Blue triangle inhibits blue protease activity. Circular arrow represents enzyme activity. (B) Bare or (C) peptide-caged liposomes opened by lipase or GzmB activity, respectively, release TEV protease that cleaves a quenched peptide substrate. Standard deviation represented by line shading. (D) Protease cleavage velocity orthogonality map measuring GzmB, WNV & TEV protease activity against respective substrates alone and in the presence of WNV

1 protease inhibitor. (E) Concentrations of GzmB across four orders of magnitude are input to the bioADC, and bbits  
2  $p_0$  and  $p_1$  are read out in a fluorescent assay ( $n = 3$ , paired two-way t-test). (F) Digital output as a function of input  
3 GzmB concentration. \*  $< 0.05$ , \*\*  $< 0.01$ , \*\*\*  $< 0.001$ , and \*\*\*\*  $< 0.0001$ .

4 To demonstrate a practical biomedical application, we next sought to interface our  
5 biological ADC with a living system as a plug-and-play therapeutic biocircuit for digital drug  
6 delivery. We rewired our ADC to autonomously quantify input bacterial activity and then output  
7 an anti-microbial drug dose to selectively clear infected red blood cells (RBCs) of bacteria (DH5 $\alpha$   
8 *Escherichia coli*) (Fig. 3A). To construct biocomparators with the ability to prioritize input levels  
9 of bacterial activity, we synthesized liposomes with peptide cages using a substrate (RRSRRVK)  
10 specific for the *E. Coli* surface protease OmpT<sup>37,38</sup> (Fig. 3B). We synthesized a series of 8  
11 biocomparators with increasing peptide densities (0–10.2 nM) and validated their ability to sense  
12 input bacterial concentrations across 8 log units (0–10<sup>8</sup> CFU/ml) using a fluorescent reporter (Fig.  
13 S6). To convert the release of signal proteases to a drug output, we designed protease-activatable  
14 prodrugs comprising cationic (polyarginine) anti-microbial peptides (AMP) (Fig. 3C, Table S1)  
15 in charge complexation with anionic peptide locks (polyglutamic acid)<sup>39</sup> to block the activity of  
16 AMP. These drug-lock peptides were linked in tandem by OR gate peptides  $p_0$  and  $p_1$  (RTKR and  
17 ENLYFQG respectively) to allow signal proteases that directly cleave  $p_0$  or  $p_1$  to digitally control  
18 the output drug dose (Fig. 2). We designed one-third and two-thirds of the total drug dose to be  
19 unlocked by cleavage of  $p_0$  and  $p_1$ , respectively, such that binary values 00, 01, 10, and 11  
20 corresponded to 0/3, 1/3, 2/3, and 3/3 of the total drug dose (Fig. S7).

21 To confirm the therapeutic efficacy of our prodrug design, treatment of bacteria with  
22 locked drug had no significant cytolytic activity compared to untreated controls, but by contrast,  
23 treatment with protease-cleaved drug-lock complexes resulted in a significant reduction in  
24 bacterial colonies (Fig. 3D). We observed similar levels of bacterial cytotoxicity when AMP was



1 directly loaded into liposomes, showing that charge complexation was required to fully block AMP  
 2 activity (**Fig. S6B**). In human RBCs infected with *E. coli* at concentrations ranging from  $10^0$ – $10^9$   
 3 CFU/mL, samples containing a single biocomparator ( $b_0$ ) lacked the ability to eliminate bacteria  
 4 as anticipated (output = 00). By contrast, increasing the number of biocomparators in the samples  
 5 ( $b_0$ – $b_3$ ) allowed our program to autonomously increase the drug dose (output 01, 10, and 11) in  
 6 response to higher bacterial loads to completely eliminate infection burdens across 9 orders of  
 7 magnitude up to  $10^9$  CFU/mL without significantly increasing hemolysis (**Fig. 3E, Fig. S8**). Our  
 8 data showed that cell-free biocircuits can be constructed using protease activity as a primary digital  
 9 signal to execute autonomous drug delivery programs under a broad range of conditions.

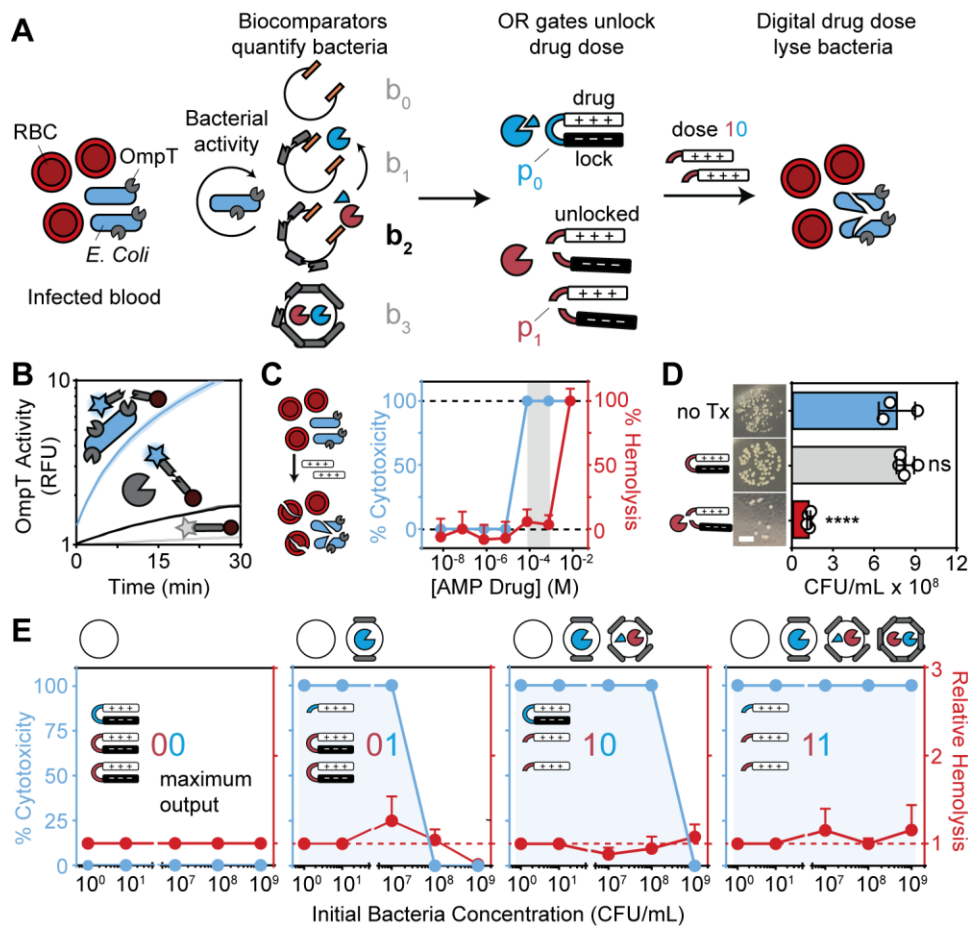

10 **Figure 3. A fully integrated bioADC to execute an antimicrobial program.** (A) Biocircuit depicting the use of an  
 11 ADC to quantify bacteria and autonomously unlock digital drug doses. Circular arrow represents enzyme activity. (B)  
 12



1 Cleavage assay measuring recombinant OmpT and live *E. coli* culture cleavage of peptide RRSRRV (n = 3, two-way  
2 ANOVA & Sidak's multiple comparisons). (C) EC50 measurement for drug cytotoxicity and hemolysis against *E.*  
3 *coli* and RBCs, respectively. Gray shading represents therapeutic window with 100% cytotoxicity and no hemolysis.  
4 (D) Viability of bacteria after treatment with locked drug and locked drug + protease. (n = 4, one-way ANOVA &  
5 Dunnett's multiple comparisons to bacteria only control; scale bar = 4 mm). (E) Drug bacteria cytotoxicity and RBC  
6 hemolysis at five concentrations of bacteria with 4 different versions of the antimicrobial program each containing a  
7 different number of biocomparators (two-way ANOVA & Sidak's multiple comparisons; hemolysis n = 2, cytotoxicity  
8 n = 3). Line shading and error bars are standard deviation. \* < 0.05, \*\* < 0.01, \*\*\* < 0.001, and \*\*\*\* < 0.0001.

9 Our antimicrobial ADC used protease activity as binary classical bbits to carry out a sense-  
10 and-respond bioprogram for drug delivery. To demonstrate the use of protease activity as  
11 probabilistic bbits to solve inference problems, we designed probabilistic circuits by leveraging  
12 protease promiscuity. Protease promiscuity occurs under multi-target (i.e., a single protease cutting  
13 multiple substrates) and common-target (i.e., multiple proteases cutting the same substrate)  
14 settings, and is a fundamental feature that allows proteases to carry out distinct physiological  
15 functions<sup>26</sup> (e.g., coagulation proteases control the formation of fibrin clots as well as the  
16 expression of adhesion molecules and cytokines<sup>40</sup>) (**Fig S9E**). To create two-state probabilistic  
17 bbits, we considered the superposed activity of a single protease cleaving two distinct substrates,  
18 and defined the probability of the protease to be found in state 0 (cleaving substrate 1) or state 1  
19 (cleaving substrate 2) by the relative cleavage velocity for either substrate<sup>41</sup> (**Fig. 4A; Fig. S9**).  
20 This allowed state probabilities (i.e., cleavage velocities) to be quantitatively controlled according  
21 to Michaelis-Menten<sup>41</sup> kinetics by changing the substrate concentration or sequence.

22 Under this framework for quantifying protease probabilities, we built a set of biological  
23 probabilistic gates to perform operations on state probabilities that we named the Uniform gate  
24 (U-gate) and Linker gate (L-gate). These gates make use of multi- and common-target promiscuity,

1 and we designed their operations based on previous implementations of probabilistic gates to solve  
2 a classic oracle problem, Learning Parity with Noise (LPN)<sup>42</sup>, where the goal is to deduce the value  
3 of a 2-bit string hidden by the oracle in the fewest number of calls (**Fig S9, Table S1, 2**). Analogous  
4 to conducting a coin flip, we designed our U-gate to create a superposition of states by taking an  
5 input bbit,  $b_0$ , in state 0 with 100% probability (i.e., single substrate cleavage) and outputting  $b_0$  in  
6 state 0 or 1 with equal probability (i.e., performed by adding a second substrate to allow multi-  
7 target cleavage) (**Fig. 4A, B**). By contrast, analogous to a classical XOR gate, we designed the L-  
8 gate to take two input bbits – control and target bbits  $b_0$  and  $b_1$  respectively – and operate on the  
9 state 1 probability of target  $b_1$  such that it exhibits parity, or is linked, to the state 1 probability of  
10 control  $b_0$  (i.e., performed by adding a second substrate to allow common-target cleavage between  
11 two proteases) (**Fig. 4C, Fig S9E**). We constructed biological scores, based on probabilistic  
12 scores<sup>42</sup>, to implement all four instances of the 2-bit LPN problem by using our U- and L-gates to  
13 operate on three protease bits – 2 string bits ( $b_0$  and  $b_1$ ) to represent possible hidden string values  
14 (00, 01, 10, and 11) and 1 answer bit ( $b_2$ ) (**Fig. S9B, C, Table S1, 2**). By multiplying all  
15 permutations of the output state 0 and 1 probabilities of bbits  $b_0$ – $b_2$  (**Fig. S9D**), our protease solver  
16 correctly deduced the value of the hidden string among all other possibilities by assigning it the  
17 highest probability in all four oracle configurations (**Fig. 4E; Fig. S9D**). Collectively, our results  
18 showed that protease activity can be quantified as state probabilities and operated by probabilistic  
19 logic gates to efficiently solve inference problems.

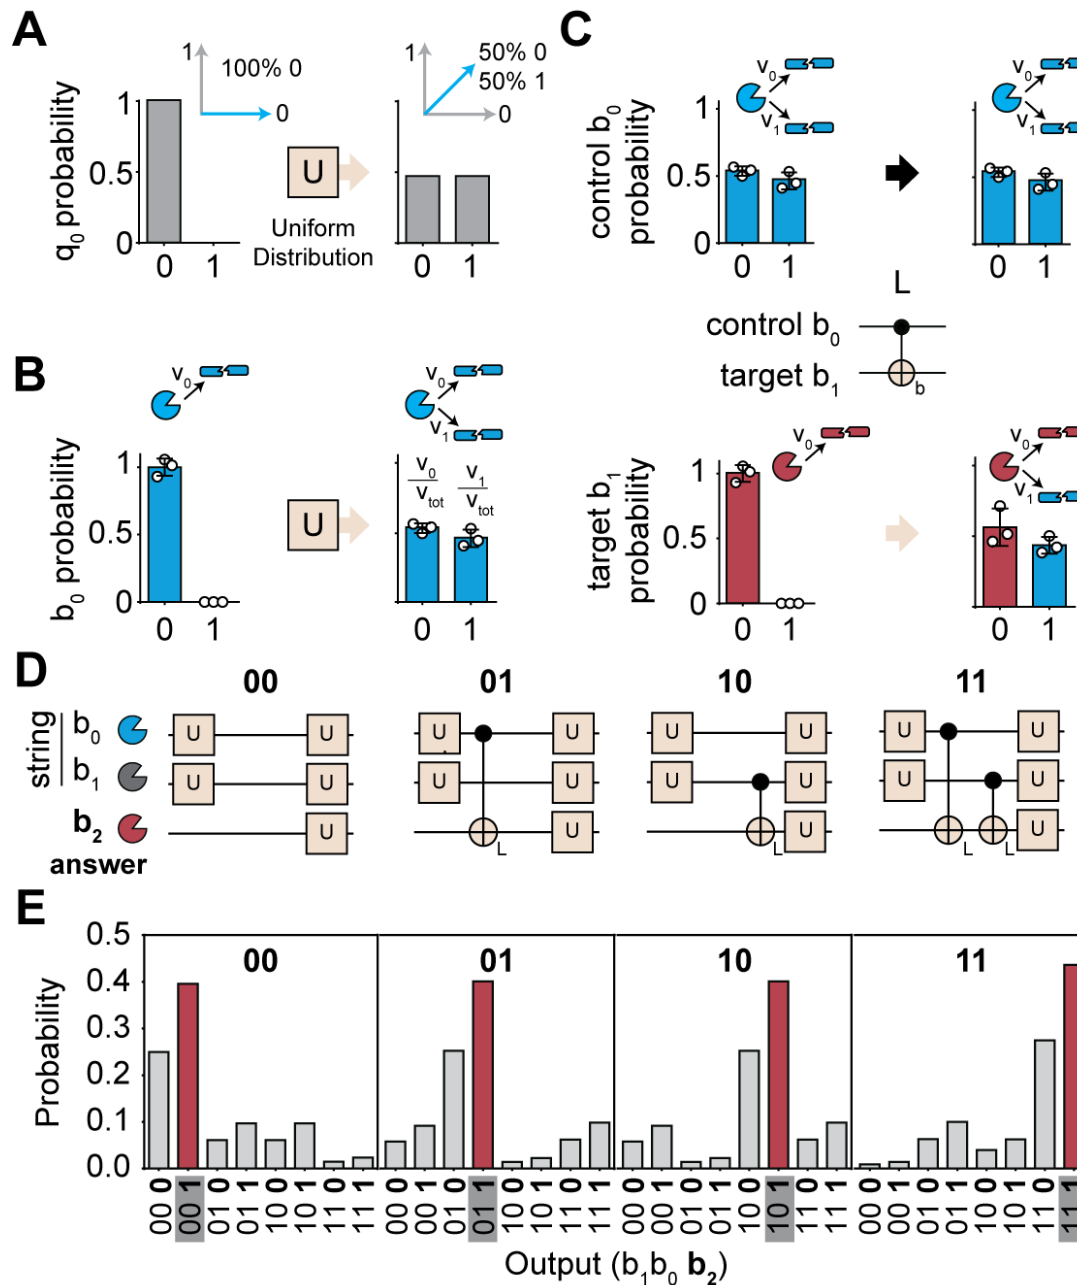

1

2

3

4

5

6

7

8

**Figure 4. Superposing bbits to solve oracle-based problems with probabilistic logic gates.** (A) Ideal inputs and outputs of a Uniform (U) gate acting on the basis state 0. (B) Implementation of the biological U gate. A protease (thrombin), first only exposed to the state 0 substrate, is then exposed to the state 1 substrate, resulting in similar probabilities of being observed in either state. (C) Control protease bit (thrombin) and target protease bit (plasmin) share similar specificity for the same state 1 substrate such that the probability of each protease cutting in the 1 state is correlated. (D) Biological scores represent four configurations of the 2-bit oracle problem. (E) Bbits solve all four implementations of the two-bit oracle problem.

1 We next sought to demonstrate a practical application using probabilistic bbits as a  
2 diagnostic platform for disease detection in living animals. The ability to detect dysregulated  
3 protease activity has important diagnostic applications for broad diseases, such as the prothrombin  
4 time (PTT) assay which is used to diagnose thrombosis<sup>43</sup>. Here we considered dysregulated  
5 protease networks, such as those in thrombosis, to be represented as an oracle string of protease  
6 activities with a distinct probability distribution compared to a healthy state (**Fig. 5A**). Analogous  
7 to the Central Limit Theorem (CLT), we postulated that designing promiscuous, common-target  
8 substrates to detect dysregulated protease networks could be modeled as sampling a probability  
9 distribution where sampling means would converge to normal distributions even if the underlying  
10 protease probability distribution is itself not normally distributed. We therefore sought to design  
11 and adapt a new set of U-gates to sample differences in uniformity between dysregulated and  
12 healthy protease networks, and use the resulting normalized variances ( $\sigma^2$ ) to discriminate disease  
13 (**Fig 5A**).

14 To test this approach computationally, we randomly generated baseline activity scores  
15 between zero and one for all 550 proteases encoded in the human genome<sup>26</sup>. Random strings of 0,  
16 20, 100, or 550 proteases were upregulated or downregulated in equal proportion by scaling their  
17 activity by a factor of five to reflect an average of literature reported values<sup>44-46</sup>. To simulate  
18 promiscuous sampling by a set of U-gates, we modeled a substrate library of size  $M$  (ranging from  
19 2–550) randomly sampling  $n$  proteases (ranging from 1–550) by adding corresponding activity  
20 scores and computing the probability distribution and normalized variance across all U-gates. The  
21 results from our model revealed that the ability to classify disease and healthy networks increases  
22 as the number of dysregulated proteases (red and green traces; **Fig. 5B**) or U-gates increases (e.g.,  
23 greater than 90% classification accuracy can be achieved with >10 U-gates and >20 dysregulated

1 proteases) (**Fig 5B**). This result showing dependence of classification accuracy on feature size was  
2 consistent with computational results based on multidimensional datasets<sup>47</sup>. To validate our model  
3 prediction, we designed seven substrates ( $U_0$ – $U_6$ ) to sense the complement (e.g., C1r, MASP2,  
4 Factor D, Factor I) and coagulation protease networks (e.g., thrombin, plasmin, factor XIIa, factor  
5 Xa, protein C) (**Fig S10**). Using the measured U-gate outputs after incubation with either group of  
6 proteases *in vitro* (**Fig 5C**), the normalized variances of the U-gate outputs classified mixtures as  
7 either complement or coagulation with perfect accuracy ( $n = 10$ , AUROC = 1.00, **Fig 5D**). These  
8 results confirmed that a set of promiscuous U-gates can be used to sample and discriminate  
9 differences in the underlying probability distributions of protease networks.

10 To apply this approach for *in vivo* diagnostics, we used a thromboplastin-induced mouse  
11 model of pulmonary embolism (PE)<sup>48</sup> to test whether our library of U-gates could discriminate  
12 mice with blood clots from healthy controls. Recently, we developed a class of protease activity  
13 sensors for delivery of mass-barcoded peptide substrates to quantify protease activity *in vivo*<sup>28,49,50</sup>.  
14 Mass-barcoded substrate libraries are conjugated to a nanoparticle carrier, delivered intravenously,  
15 and upon protease cleavage, release substrate fragments that are cleared into urine for  
16 quantification by mass spectrometry according to their mass barcode. Using this platform, we  
17 administered a single cocktail of our seven mass-barcoded U-gates to quantify protease activity in  
18 healthy mice (**Fig. 5E; Fig. S11**)<sup>28</sup> as well as in mice induced with PE (**Fig. 5F**). The measured  
19 variance across our 7 U-gates noninvasively diagnosed PE with high sensitivity and specificity  
20 (AUROC = 0.92) (**Fig. 5F, G; Fig. S12**), and consistent with our mathematical predictions, overall  
21 classification accuracy increased from 0.5 to 0.92 as the number of U-gates used in the classifier  
22 increased from zero to seven respectively (**Fig. 5G**). Collectively, our data showed that by treating

1 strings of protease activity as a probability distribution, the underlying sample variance can be  
 2 used to infer and diagnose pulmonary embolism with high accuracy.

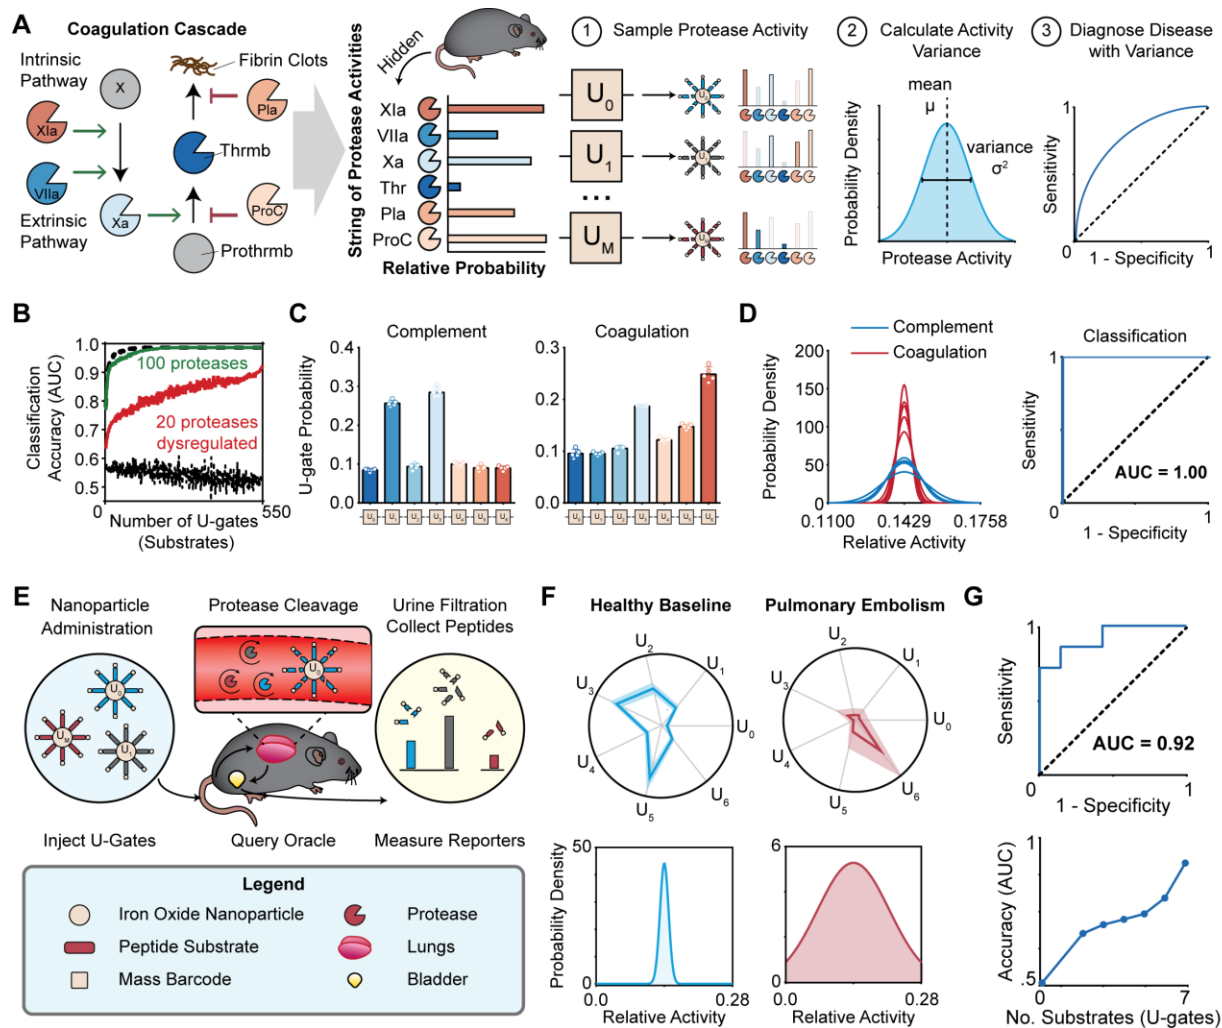

3  
 4 **Figure 5. Applying the biological oracle algorithm to noninvasively detect pulmonary embolism. (A)**

5 Coagulation cascade comprised of protease network can form or degrade fibrin clots. The individual protease activities  
 6 can be represented as a string of numbers, by supposing that the organism behaves as a biological oracle. The relative  
 7 activity of each protease is sampled when multiple proteases cut the same substrate (i.e., U-gate). The variance of the  
 8 U-gate signals reflects the uniformity of the underlying string of protease activities ( $b_0$ — $b_N$ ). The variance is used to  
 9 classify mice as diseased or healthy. **(B)** Simulation of healthy and diseased protease networks, where variable  
 10 numbers of proteases are dysregulated in the disease case. Measuring the effect of increasing number of substrates on  
 11 the disease classification accuracy, given variable numbers of dysregulated proteases. Bottom dashed black line

1 represents control case where no proteases are dysregulated, and top dashed black line represents control case were  
2 all 550 proteases are dysregulated. (C) Activity signatures of complement (left) and coagulation (right) protease  
3 cocktails against the seven U-gates ( $U_0$ — $U_6$ ). Error bars represent standard deviation ( $n = 5$ ). (D) (left) Measuring  
4 variance from all coagulation and complement mixtures, plotted as the normal probability distribution functions.  
5 (right) Using the U-gate variance to classify the protease cocktails as complement or coagulation. (E) Nanoparticles  
6 carrying peptide substrates (U-gates) are injected in to the mouse and proteases cleave off mass tag reporters from  
7 each gate. The reporters are filtered into the urine and collected for quantification by mass spectrometry. (F) (top)  
8 Urinalysis measuring the concentration of each of the seven U-gates on Day 0 (healthy) and Day 4 (disease) averaged  
9 between all seven animals. Maximum quantity for healthy and disease plots is 0.1 and 0.3, respectively. Shading is  
10 standard deviation. (bottom) Measuring variance from one example healthy and disease mouse, plotted as the normal  
11 probability distribution function. (G) (top) Classifying pulmonary embolism with U-gate variance. (bottom)  
12 Classification accuracy increases with increased number of substrates (plotted as mean of all possible combinations).

13

## 14 Discussion

15 By interpreting protease activity as carrying binary or probabilistic information, we  
16 demonstrated the use of proteases as biological bits in cell-free biocircuits for therapeutic and  
17 diagnostic applications. We used the classical interpretation of protease bbits to construct a 2-bit  
18 analog-to-digital converter (ADC) as an autonomous drug delivery biocircuit to clear infected  
19 blood of bacteria across 9 orders magnitude in concentration. To construct our biological ADC,  
20 we designed biocomparators using peptide-caged liposomes because these materials are well-  
21 tolerated and biologically compatible<sup>51,52</sup>. Our cell-free approach is distinct from cell-based  
22 genetic circuits<sup>7,53</sup> that require significant protein or organismal engineering to control signaling,  
23 including the non-trivial OFF state for proteases which has required insertion strategies<sup>11-13</sup>  
24 artificial autoinhibitors<sup>31</sup>, or dimerizing leucine zippers<sup>53</sup> to control. Cell-free liposomes have also  
25 been used in past studies such as synthetic minimal cells to control the expression of genetic



1 circuits by liposome fusion<sup>54,55</sup>. Our approach may be amenable to integration with these genetic  
2 approaches, if for example, these circuits were redesigned to input or output proteases.

3 In contrast to classical binary bits, we also explored the use of protease activity as  
4 probabilistic bits. By leveraging both multi-target and common-target protease promiscuity, we  
5 designed logic gates to operate on the probability states of protease bbits to provide the ability to  
6 solve inference-based oracle problems, such as LPN, by deducing the correct value of hidden  
7 strings with the highest probability. We further considered dysregulated protease networks within  
8 a living animal as representing a biological oracle with a distinct probability distribution of states,  
9 which enabled us to noninvasively diagnose thrombosis with high classification accuracy. This  
10 approach is similar to the Central Limit Theorem (CLT) where sampling an unknown probability  
11 distribution, regardless whether the probability distribution itself is normally distributed or not,  
12 will result in sample means that converge to a normal distribution with variance proportional to  
13 the unknown distribution<sup>56</sup>. Therefore, we designed promiscuous U-gates to sample the underlying  
14 probability distribution of dysregulated protease networks such as the coagulation cascade, and  
15 using as few as seven substrates, achieved a disease classification accuracy  $> 0.92$  *in vivo*. As there  
16 are  $>15$  proteases involved in these cascades, we envision that the future use of larger ( $>50$ )  
17 substrate libraries may allow development of pan-diagnostics capable of monitoring whole-  
18 organism protease activities ( $>250$  extracellular proteases).

19 Under both classical and probabilistic frameworks, our biological circuits were designed  
20 to sense extracellular proteases, which we do not envision will limit potential *in vitro* or *in vivo*  
21 applications. Of the greater than 550 proteases encoded by the genome, over half are secreted or  
22 membrane-bound and involved in a host of different diseases<sup>26,57</sup>. A significantly greater diversity  
23 of secreted and membrane bound proteases is represented by bacterial and viral species<sup>58-62</sup>. This

1 rich diversity has provided the biological foundation for biomedical applications that rely on  
2 extracellular protease activation of pro-drug or pro-diagnostics in living animals including  
3 patients<sup>57,58</sup>. In our work, we provided examples of multiple types of biocircuits (ADC, logic gates,  
4 comparators, etc.) that are modular and can be engineered to input or output bacterial (OmpT),  
5 viral (TEV, WNV), murine (coagulation cascade), or mammalian (GzmB) proteases in both *in*  
6 *vitro* and *in vivo* settings. Looking forward, by integrating the full richness of protease biology and  
7 promiscuity, harnessing proteases as binary or probabilistic bits may provide a unique biological  
8 advantage for programmable control of future therapeutics and diagnostics.

## References:

- 1 Baron, R., Lioubashevski, O., Katz, E., Niazov, T. & Willner, I. Logic Gates and Elementary Computing by Enzymes. *The Journal of Physical Chemistry A* **110**, 8548-8553, doi:10.1021/jp0568327 (2006).
- 2 Elowitz, M. B. & Leibler, S. A synthetic oscillatory network of transcriptional regulators. *Nature* **403**, 335, doi:10.1038/35002125 (2000).
- 3 Tigges, M., Marquez-Lago, T. T., Stelling, J. & Fussenegger, M. A tunable synthetic mammalian oscillator. *Nature* **457**, 309-312, doi:10.1038/nature07616 (2009).
- 4 Adleman, L. M. Molecular computation of solutions to combinatorial problems. *Science (New York, N.Y.)* **266**, 1021-1024 (1994).
- 5 Amir, Y. *et al.* Universal computing by DNA origami robots in a living animal. *Nature nanotechnology* **9**, 353, doi:10.1038/nnano.2014.58 <https://www.nature.com/articles/nnano.2014.58#supplementary-information> (2014).
- 6 Pei, R., Matamoros, E., Liu, M., Stefanovic, D. & Stojanovic, M. N. Training a molecular automaton to play a game. *Nature nanotechnology* **5**, 773-777, doi:10.1038/nnano.2010.194 (2010).
- 7 Higashikuni, Y., Chen, W. C. W. & Lu, T. K. Advancing therapeutic applications of synthetic gene circuits. *Current opinion in biotechnology* **47**, 133-141, doi:<https://doi.org/10.1016/j.copbio.2017.06.011> (2017).
- 8 Smole, A., Lainscek, D., Bezeljak, U., Horvat, S. & Jerala, R. A Synthetic Mammalian Therapeutic Gene Circuit for Sensing and Suppressing Inflammation. *Molecular therapy : the journal of the American Society of Gene Therapy* **25**, 102-119, doi:10.1016/j.ymthe.2016.10.005 (2017).
- 9 Xie, M. *et al.*  $\beta$ -cell-mimetic designer cells provide closed-loop glycemetic control. *Science (New York, N.Y.)* **354**, 1296-1301, doi:10.1126/science.aaf4006 (2016).
- 10 Brophy, J. A. N. & Voigt, C. A. Principles of genetic circuit design. *Nature Methods* **11**, 508, doi:10.1038/nmeth.2926 <https://www.nature.com/articles/nmeth.2926#supplementary-information> (2014).
- 11 Karginov, A. V., Ding, F., Kota, P., Dokholyan, N. V. & Hahn, K. M. Engineered allosteric activation of kinases in living cells. *Nature biotechnology* **28**, 743, doi:10.1038/nbt.1639 <https://www.nature.com/articles/nbt.1639#supplementary-information> (2010).
- 12 Dagliyan, O. *et al.* Rational design of a ligand-controlled protein conformational switch. *Proceedings of the National Academy of Sciences* **110**, 6800-6804, doi:10.1073/pnas.1218319110 (2013).
- 13 Guntas, G., Mansell, T. J., Kim, J. R. & Ostermeier, M. Directed evolution of protein switches and their application to the creation of ligand-binding proteins. *Proceedings of the National Academy of Sciences of the United States of America* **102**, 11224-11229, doi:10.1073/pnas.0502673102 (2005).
- 14 Gelenbe, E. & Kahane, J.-P. *Fundamental Concepts in Computer Science*. (Imperial College press, 2009).
- 15 Kevin, M. *Machine Learning: A Probabilistic Perspective*. (The MIT Press, 2012).
- 16 Camsari, K. Y., Sutton, B. M. & Datta, S. p-Bits for Probabilistic Spin Logic. *arXiv e-prints* (2018). <<https://ui.adsabs.harvard.edu/#abs/2018arXiv180904028C>>.
- 17 Camsari, K. Y., Faria, R., Sutton, B. M. & Datta, S. Stochastic p-Bits for Invertible Logic. *Physical Review X* **7**, 031014, doi:10.1103/PhysRevX.7.031014 (2017).

- 1 18 Zeeshan Pervaiz, A., Sutton, B. M., Anirudh Ghantasala, L. & Camsari, K. Y. Weighted  
2 p-bits for FPGA implementation of probabilistic circuits. *arXiv e-prints* (2017).  
3 <<https://ui.adsabs.harvard.edu/#abs/2017arXiv171204166Z>>.
- 4 19 Ladd, T. D. *et al.* Quantum computers. *Nature* **464**, 45, doi:10.1038/nature08812 (2010).  
5 20 Nielsen, M. A. & Chuang, I. L. *Quantum Computation and Quantum Information: 10th*  
6 *Anniversary Edition*. (Cambridge University Press, 2010).
- 7 21 Bird, P. I., Trapani, J. A. & Villadangos, J. A. Endolysosomal proteases and their  
8 inhibitors in immunity. *Nature Reviews Immunology* **9**, 871, doi:10.1038/nri2671 (2009).  
9 22 Heutinck, K. M., ten Berge, I. J., Hack, C. E., Hamann, J. & Rowshani, A. T. Serine  
10 proteases of the human immune system in health and disease. *Molecular immunology* **47**,  
11 1943-1955, doi:10.1016/j.molimm.2010.04.020 (2010).
- 12 23 Smith, E. & Morowitz, H. J. Universality in intermediary metabolism. *Proceedings of the*  
13 *National Academy of Sciences of the United States of America* **101**, 13168-13173,  
14 doi:10.1073/pnas.0404922101 (2004).
- 15 24 Palta, S., Saroa, R. & Palta, A. Overview of the coagulation system. *Indian Journal of*  
16 *Anaesthesia* **58**, 515-523, doi:10.4103/0019-5049.144643 (2014).
- 17 25 Pérez-Silva, J. G., Español, Y., Velasco, G. & Quesada, V. The Degradome database:  
18 expanding roles of mammalian proteases in life and disease. *Nucleic Acids Research* **44**,  
19 D351-D355, doi:10.1093/nar/gkv1201 (2016).
- 20 26 Lopez-Otin, C. & Bond, J. S. Proteases: multifunctional enzymes in life and disease. *The*  
21 *Journal of biological chemistry* **283**, 30433-30437, doi:10.1074/jbc.R800035200 (2008).  
22 27 Dudani, J. S., Jain, P. K., Kwong, G. A., Stevens, K. R. & Bhatia, S. N. Photoactivated  
23 Spatiotemporally-Responsive Nanosensors of in Vivo Protease Activity. *ACS Nano* **9**,  
24 11708-11717, doi:10.1021/acs.nano.5b05946 (2015).
- 25 28 Holt, B. A., Mac, Q. D. & Kwong, G. A. Nanosensors to Detect Protease Activity In  
26 Vivo for Noninvasive Diagnostics. *JoVE*, e57937, doi:doi:10.3791/57937 (2018).  
27 29 To, T.-L. *et al.* Rationally designed fluorogenic protease reporter visualizes  
28 spatiotemporal dynamics of apoptosis in vivo. *Proceedings of the National Academy of*  
29 *Sciences* **112**, 3338-3343, doi:10.1073/pnas.1502857112 (2015).
- 30 30 Kwong, G. A. *et al.* Mass-encoded synthetic biomarkers for multiplexed urinary  
31 monitoring of disease. *Nat Biotech* **31**, 63-70,  
32 doi:[http://www.nature.com/nbt/journal/v31/n1/abs/nbt.2464.html#supplementary-](http://www.nature.com/nbt/journal/v31/n1/abs/nbt.2464.html#supplementary-information)  
33 [information](http://www.nature.com/nbt/journal/v31/n1/abs/nbt.2464.html#supplementary-information) (2013).
- 34 31 Stein, V. & Alexandrov, K. Protease-based synthetic sensing and signal amplification.  
35 *Proceedings of the National Academy of Sciences* **111**, 15934-15939,  
36 doi:10.1073/pnas.1405220111 (2014).
- 37 32 Holt, B. A. *et al.* Fc microparticles can modulate the physical extent and magnitude of  
38 complement activity. *Biomaterials science* **5**, 463-474, doi:10.1039/c6bm00608f (2017).
- 39 33 Donnelly, S., Dalton, J. P. & Robinson, M. W. How pathogen-derived cysteine proteases  
40 modulate host immune responses. *Adv Exp Med Biol* **712**, 192-207, doi:10.1007/978-1-  
41 4419-8414-2\_12 (2011).
- 42 34 Basel, M. T., Shrestha, T. B., Troyer, D. L. & Bossmann, S. H. Protease-Sensitive,  
43 Polymer-Caged Liposomes: A Method for Making Highly Targeted Liposomes Using  
44 Triggered Release. *ACS Nano* **5**, 2162-2175, doi:10.1021/nn103362n (2011).

- 1 35 Lee, S.-M., Chen, H., Dettmer, C. M., O'Halloran, T. V. & Nguyen, S. T. Polymer-Caged  
2 Liposomes: A pH-Responsive Delivery System with High Stability. *Journal of the*  
3 *American Chemical Society* **129**, 15096-15097, doi:10.1021/ja070748i (2007).
- 4 36 Titball, R. W. Bacterial phospholipases C. *Microbiological Reviews* **57**, 347-366 (1993).
- 5 37 Grodberg, J. & Dunn, J. J. ompT encodes the Escherichia coli outer membrane protease  
6 that cleaves T7 RNA polymerase during purification. *Journal of Bacteriology* **170**, 1245-  
7 1253 (1988).
- 8 38 McCarter, J. D. *et al.* Substrate Specificity of the Escherichia coli Outer Membrane  
9 Protease OmpT. *Journal of Bacteriology* **186**, 5919-5925, doi:10.1128/JB.186.17.5919-  
10 5925.2004 (2004).
- 11 39 Olson, E. S. *et al.* In vivo characterization of activatable cell penetrating peptides for  
12 targeting protease activity in cancer. *Integrative biology : quantitative biosciences from*  
13 *nano to macro* **1**, 382-393, doi:10.1039/b904890a (2009).
- 14 40 Spronk, H. M. H. *et al.* Pleiotropic effects of factor Xa and thrombin: what to expect  
15 from novel anticoagulants. *Cardiovascular Research* **101**, 344-351,  
16 doi:10.1093/cvr/cvt343 (2014).
- 17 41 Menten, L. & Michaelis, M. Die kinetik der invertinwirkung. *Biochem Z* **49**, 333-369  
18 (1913).
- 19 42 Ristè, D. D. S., Marcus P; Ryan, Colm A; Cross, Andrew W; Córcoles, Antonio D;  
20 Smolin, John A; Gambetta, Jay M; Chow, Jerry M; Johnson, Blake R. Demonstration of  
21 quantum advantage in machine learning. *NP J Quantum Information* **3**, 1-5 (2017).
- 22 43 Suchman, A. L. & Griner, P. F. Diagnostic uses of the activated partial thromboplastin  
23 time and prothrombin time. *Annals of internal medicine* **104**, 810-816 (1986).
- 24 44 Krochmal, M. *et al.* Urinary peptidomics analysis reveals proteases involved in diabetic  
25 nephropathy. *Scientific Reports* **7**, 15160, doi:10.1038/s41598-017-15359-9 (2017).
- 26 45 Tarca, A. L., Romero, R. & Draghici, S. Analysis of microarray experiments of gene  
27 expression profiling. *American journal of obstetrics and gynecology* **195**, 373-388,  
28 doi:10.1016/j.ajog.2006.07.001 (2006).
- 29 46 Kappelhoff, R. *et al.* Overview of transcriptomic analysis of all human proteases, non-  
30 proteolytic homologs and inhibitors: Organ, tissue and ovarian cancer cell line expression  
31 profiling of the human protease degradome by the CLIP-CHIP™ DNA microarray.  
32 *Biochimica et Biophysica Acta (BBA) - Molecular Cell Research* **1864**, 2210-2219,  
33 doi:<https://doi.org/10.1016/j.bbamcr.2017.08.004> (2017).
- 34 47 Zhao, Q. *et al.* Combining multidimensional genomic measurements for predicting  
35 cancer prognosis: observations from TCGA. *Briefings in bioinformatics* **16**, 291-303,  
36 doi:10.1093/bib/bbu003 (2015).
- 37 48 Weiss, E. J., Hamilton, J. R., Lease, K. E. & Coughlin, S. R. Protection against  
38 thrombosis in mice lacking PAR3. *Blood* **100**, 3240-3244, doi:10.1182/blood-2002-05-  
39 1470 (2002).
- 40 49 Kwong, G. A. *et al.* Mathematical framework for activity-based cancer biomarkers. *Proc*  
41 *Natl Acad Sci U S A* **112**, 12627-12632, doi:10.1073/pnas.1506925112 (2015).
- 42 50 Kwong, G. A. *et al.* Mass-encoded synthetic biomarkers for multiplexed urinary  
43 monitoring of disease. *Nat Biotechnol* **31**, 63-70, doi:10.1038/nbt.2464 (2013).
- 44 51 Sago, C. D. *et al.* High-throughput in vivo screen of functional mRNA delivery identifies  
45 nanoparticles for endothelial cell gene editing. *Proceedings of the National Academy of*  
46 *Sciences* **115**, E9944-E9952, doi:10.1073/pnas.1811276115 (2018).



- 1 52 Betz, G., Aeppli, A., Menshutina, N. & Leuenberger, H. In vivo comparison of various  
2 liposome formulations for cosmetic application. *International journal of pharmaceutics*  
3 **296**, 44-54, doi:10.1016/j.ijpharm.2005.02.032 (2005).
- 4 53 Gao, X. J., Chong, L. S., Kim, M. S. & Elowitz, M. B. Programmable protein circuits in  
5 living cells. *Science (New York, N.Y.)* **361**, 1252-1258, doi:10.1126/science.aat5062  
6 (2018).
- 7 54 Adamala, K. P., Martin-Alarcon, D. A., Guthrie-Honea, K. R. & Boyden, E. S.  
8 Engineering genetic circuit interactions within and between synthetic minimal cells.  
9 *Nature Chemistry* **9**, 431, doi:10.1038/nchem.2644  
10 <https://www.nature.com/articles/nchem.2644#supplementary-information> (2016).
- 11 55 Fernandez-Rodriguez, J. & Voigt, C. A. Post-translational control of genetic circuits  
12 using Potyvirus proteases. *Nucleic Acids Research* **44**, 6493-6502,  
13 doi:10.1093/nar/gkw537 (2016).
- 14 56 Kwak, S. G. & Kim, J. H. Central limit theorem: the cornerstone of modern statistics.  
15 *Korean journal of anesthesiology* **70**, 144-156, doi:10.4097/kjae.2017.70.2.144 (2017).
- 16 57 Cudic, M. & Fields, G. B. Extracellular proteases as targets for drug development.  
17 *Current protein & peptide science* **10**, 297-307 (2009).
- 18 58 Culp, E. & Wright, G. D. Bacterial proteases, untapped antimicrobial drug targets. *The*  
19 *Journal Of Antibiotics* **70**, 366, doi:10.1038/ja.2016.138 (2016).
- 20 59 Frees, D., Brondsted, L. & Ingmer, H. Bacterial proteases and virulence. *Sub-cellular*  
21 *biochemistry* **66**, 161-192, doi:10.1007/978-94-007-5940-4\_7 (2013).
- 22 60 Ingmer, H. & Brondsted, L. Proteases in bacterial pathogenesis. *Research in*  
23 *microbiology* **160**, 704-710, doi:10.1016/j.resmic.2009.08.017 (2009).
- 24 61 Babé, L. M. & Craik, C. S. Viral Proteases: Evolution of Diverse Structural Motifs to  
25 Optimize Function. *Cell* **91**, 427-430, doi:10.1016/S0092-8674(00)80426-2 (1997).
- 26 62 Tong, L. Viral Proteases. *Chemical Reviews* **102**, 4609-4626, doi:10.1021/cr010184f  
27 (2002).

28

29

30 **Acknowledgments:** This work was funded by an NIH Director's New Innovator Award (Award No.  
31 DP2HD091793). B.A.H is supported by the NSF GRFP, National Institutes of Health GT BioMAT Training Grant  
32 under Award Number 5T32EB006343 and the Georgia Tech President's Fellowship. This material is based upon  
33 work supported by the National Science Foundation Graduate Research Fellowship under Grant No. **DGE-1650044**  
34 (B.A.H.). G.A.K. holds a Career Award at the Scientific Interface from the Burroughs Wellcome Fund. We  
35 acknowledge Dr. D. Myers (Georgia Tech and Emory) and S. N. Dahotre (Georgia Tech and Emory) for their  
36 helpful discussions during the preparation of the manuscript. The authors thank Quoc Mac (Georgia Tech) for  
37 assistance with the mouse model. The content is solely the responsibility of the authors and does not necessarily  
38 represent the official views of the National Institutes of Health. We acknowledge use of the IBM Q for this work.  
39 The views expressed are those of the authors and do not reflect the official policy or position of IBM or the IBM Q  
40 team. **Author contributions:** B.A.H. and G.A.K. designed research; B.A.H. performed research; B.A.H. and  
41 G.A.K. analyzed data; and B.A.H and G.A.K. wrote the paper. **Competing interests:** No competing interests. **Data**  
42 **and materials availability:** All data is available in the main text or the supplementary materials.

43

44

45

46

## Supplementary Materials:

Materials and Methods

Figs. S1 to S13

Tables S1 to S3

## Biological bits for programmable medicine

Brandon Alexander Holt<sup>1</sup> & Gabriel A. Kwong<sup>1–5,\*</sup>

<sup>1</sup> Wallace H. Coulter Department of Biomedical Engineering, Georgia Tech College of Engineering and Emory School of Medicine, Atlanta, GA 30332, USA.

<sup>2</sup> Parker H. Petit Institute of Bioengineering and Bioscience, Atlanta, GA 30332, USA.

<sup>3</sup> Institute for Electronics and Nanotechnology, Georgia Tech, Atlanta, GA 30332.

<sup>4</sup> Integrated Cancer Research Center, Georgia Tech, Atlanta, GA 30332.

<sup>5</sup> The Georgia Immunoengineering Consortium, Emory University and Georgia Tech, Atlanta, GA 30332.

\*Correspondence to: G.A.K., [gkwong@gatech.edu](mailto:gkwong@gatech.edu)



## 1 **Materials and Methods**

### 2 **1 Animals**

3 6- to 8-week old female mice were used at the outset of all experiments. Mice were purchased  
4 from Charles River Laboratories. All animal protocols were approved by Georgia Tech IACUC  
5 (protocol #A17097).  
6

### 7 **2 Protease Cleavage Assays**

8 All protease cleavage assays were performed with a BioTek Cytation 5 Imaging Plate  
9 Reader, taking fluorescent measurements at 485/528 nm and 540/575 nm  
10 (excitation/emission) for read-outs measuring peptide substrates terminated with FITC  
11 (Fluorescein isothiocyanate) and 5-TAMRA (5-Carboxytetramethylrhodamine),  
12 respectively. Kinetic measurements were taken every minute over the course of 60 – 120  
13 minutes at 37 C. West Nile Virus NS3 protease (WNVp) and Tobacco Etch Virus protease  
14 (TEVp), along with their substrates, inhibitors and buffers were obtained from Anaspec,  
15 Inc. (Fremont, CA). Phospholipase C (PLC), Phosphatidylinositol-Specific (from *Bacillus*  
16 *cereus*) was purchased from Thermo Fisher Scientific (Waltham, MA). Activity RFU  
17 measurements were normalized to time 0 measurement, and as such represent fold change  
18 in signal. Granzyme B (GzmB) was purchased from PeproTech, Inc. (Rocky Hill, NJ).  
19 Thrombin and Factor XIa were purchased from Haematologic Technologies (Essex, VT).  
20 Outer Membrane Protease T (OmpT, Protease 7) was purchased from Lifespan Biosciences  
21 (Seattle, WA). C1r was purchased from Millipore Sigma (Burlington, MA). GzmB,  
22 Thrombin, Factor XIa, and C1r fluorescent peptide substrates were custom ordered from  
23 CPC Scientific (Sunnyvale, CA). OmpT fluorescent peptide substrate was custom ordered  
24 from Genscript (Piscataway, NJ). See **Table S1** and **Table S2** for more information  
25 regarding proteases, substrates, and inhibitors.  
26

#### 27 **2.1 Figure 2B**

28 10 uL of liposomes (34 mM) loaded with TEVp (1 ug protease/17 mmol liposome) were  
29 coincubated with 50 uL TEVp substrate in provided activity buffer (pH 7.5). 2 uL of  
30 PLC (100 units/mL) was added to the experimental group, and 2 uL of assay buffer was  
31 added to the control group.  
32

#### 33 **2.2 Figure 2C**

34 10 uL of liposomes (34 mM) loaded with TEVp (1 ug protease/17 mmol liposome),  
35 embedded with 10 mol% CPAA and crosslinked at 0.1% efficiency with GzmB  
36 substrate were coincubated with 50 uL TEVp substrate in provided activity buffer (pH  
37 7.5). 2 uL PLC (100 U/mL) was added to both the control and experimental group. 2 uL  
38 GzmB (0.1 ug/uL) was added only to experimental group.  
39

#### 40 **2.3 Figure 2D**

41 All amounts of protease, substrate, and inhibitor for WNVp and TEVp were added  
42 according to instructions from Anaspec WNVp and TEVp activity kit. All conditions  
43 incubated with WNVp inhibitor include protease of interest incubated with its primary  
44 substrate. GzmB was added at a working concentration of (0.01 mg/mL) to 2 uM of its  
45 peptide substrate.

1  
2 2.4 Figure 2E

3 All 4 biocomparator levels (b<sub>0</sub>-b<sub>3</sub>, 50 mM each) were added together (10 uL each), and  
4 co-incubated with 13 uL of GzmB solution (concentration varies depending on  
5 condition), 2 uL of PLC (100 U/mL), 0.5 uL of WNVp substrate (after diluted 100X  
6 according to manufacturer's instructions), 0.5 uL of TEVp substrate (after diluted 100X  
7 according to manufacturer's instructions), and 4 uL of assay buffer. Biocomparator  
8 levels 0-3 are referenced by peptide cage crosslinking efficiencies of 0, 0.01, 1 and  
9 100%, respectively. Plotted values are taken at minute 30 and normalized to starting  
10 values (time 0, or equivalently, the no protease control). Paired t-tests were also  
11 performed between the Q<sub>0</sub> and Q<sub>1</sub> digit for each condition.  
12

13 2.5 Figure 3B

14 For recombinant OmpT condition, 2 uL of OmpT (0.5 mg/mL) was added to 18 uL of 2  
15 uM OmpT substrate. For E. coli condition, 2 uL of E. coli (10<sup>9</sup> CFU/mL) was added to  
16 18 uL of 2 uM OmpT substrate. 2 uL of DI H<sub>2</sub>O was added to negative control, along  
17 with 18 uL of OmpT substrate.  
18

19 2.6 Figure 4B and 4C

20 2 uL of Thrombin (10.1 mg/mL) or Plasmin (6.9 mg/mL) were added to 18 uL of  
21 respective state 1 or state 0 substrate (2 uM). Velocities of Thrombin and Plasmin  
22 cutting their respective state 1 or state 0 substrates were calculated over the first 5  
23 minutes of incubation. These velocities were normalized by the sum of the state 1 and  
24 state 0 velocity. Therefore, the values plotted as probability in Figure 4 are relative  
25 velocities.  
26

27 2.7 Figure 4E

28 Protease bbit configurations for each implementation of the Oracle are referenced in  
29 **Fig. S10D**, and in each case 2 uL of protease was added to 2 uM of respective state  
30 substrate. H gates are made reversible by adding in the original state substrate (state-0)  
31 at a concentration 10-fold the new state (state-1). Stock concentrations of the proteases  
32 involved were: Factor XIa (6 mg/mL), Plasmin (6.9 mg/mL), Thrombin (10.1 mg/mL),  
33 and C1r (1 mg/mL). State 0 and State 1 peptide substrates were CC1 and CC6 for FXIa,  
34 CC4 and CC1 for C1r, CC2 and CC6 for Thrombin, and CC2 and CC9 for Plasmin.  
35 Probability of two digit state is calculated by multiplying the probability (relative  
36 velocity) for each individual protease bbit. For example, if the first digit (bbit) is  
37 Protease A, with relative velocities V<sub>a1</sub> and V<sub>a2</sub>, and the second digit is Protease B, with  
38 velocities V<sub>b1</sub> and V<sub>b0</sub>, then the probability of achieving the answer 01 = V<sub>b0</sub>\*V<sub>a1</sub>.  
39

40 **3 Liposome Synthesis and Characterization**

41 Liposome synthesis kit, PIPES buffer, EDC\*MeI, and spin filters (100 kDa m.w.c.o.) were  
42 purchased from Millipore Sigma (Burlington, MA). Cholesterol-anchored Polyacrylic Acid  
43 (4400 g/mol, 30-40 COOH groups/molecule, structure in **Fig. S3A**) was custom ordered from  
44 Nanocs (Boston, MA). Float-a-lyzer dialysis tubes (100 kDa m.w.c.o., 1 mL) were  
45 purchased from Spectrum Labs (Rancho Dominguez, CA). Synthesis protocol is adapted  
46 from the methods used by Basel et. al. (29). Liposomes were loaded with respective protease

1 inhibitor cocktail amounts, and concentration was estimated via absorbance. Standard curve  
2 for estimating concentration of liposomes was used by correlating absorbance of liposome  
3 solution at 230 nm with known standard concentrations (**Fig. S3B**). CPAA was vortexed in  
4 warm water (< 10 mg/mL) and volume was added such that there was 10 mol% CPAA  
5 relative to the molarity of lipids in the liposome solution. Solution was incubated for 1 hour  
6 at room temperature, or overnight at 4 C. Excess polymer and materials were removed via  
7 centrifugation (spin filters, 3-5 times at 4700 XG for 10 mins) or float-a-lyzer membranes  
8 (4C in spinning water overnight). EDC\*MeI was dissolved into 10 mM PIPES buffer and  
9 volume was added such that EDC\*MeI:CPAA ratio was 4:1. Solution was incubated for 20  
10 minutes at room temperature. Excess EDC was filtered out via centrifugation or dialysis  
11 tubes. Peptide crosslinker was added at desired molar ratio and incubated for 1 hour at room  
12 temperature or 4 C. Excess peptide was filtered via centrifugation or dialysis tubes. Change  
13 in liposome hydrodynamic diameter was measured via DLS on a Zetasizer Nano ZS,  
14 Malvern Panalytical (Netherlands). Volumes loaded into biocomparators include  
15 concentrations of proteases and inhibitors as follows: b<sub>0</sub> = empty; b<sub>1</sub> = 20 uL WNVp (0.1  
16 mg/mL) + 80 uL DI H<sub>2</sub>O; b<sub>2</sub> = 50 uL WNV inhibitor (1 uM) + 50 uL TEVp (0.04 mg/mL);  
17 b<sub>3</sub> = 50 uL WNVp (0.1 mg/mL) + 50 uL TEVp (0.08 mg/mL).  
18

#### 19 **4 Bacterial Cytotoxicity & Human Red Blood Cell Hemolysis Assays**

##### 20 *Bacterial culture and cytotoxicity measurement*

21 DH5α *Escherichia coli* were a gift from Todd Sulchek's BioMEMS lab at Georgia Tech. E.  
22 coli were cultured in LB broth (Lennox) at 37 C and plated on LB agar (Lennox) plates. LB  
23 broth was purchased from Millipore Sigma (Burlington, MA) and LB agar was purchased  
24 from Invitrogen (Carlsbad, CA). AMP and locked AMP were custom ordered from Genscript  
25 (Piscataway, NJ). See **Table S1** for more information. Bacteria were grown to a  
26 concentration of 10<sup>9</sup> CFU/mL before being used for experiments. Concentration was  
27 estimated by measuring the OD<sub>600</sub> of the bacterial suspension, and assuming an OD<sub>600</sub> of  
28 1.000 corresponds to a concentration of 8 x 10<sup>8</sup> CFU/mL. Bacterial cell viability was  
29 measured by making eight 10-fold serial dilutions, and plating three 10 uL spots on an LB  
30 agar plate. Plates were incubated overnight at 37C, and CFUs were counted. Untreated  
31 bacteria CFU counts served as control for 0% cytotoxicity, and bacteria + IPA (or 0  
32 countable CFUs) served as control for 100% cytotoxicity.  
33

##### 34 *RBC collection and hemolysis measurement*

35 Healthy blood donors had abstained from aspirin in the last two weeks, and consent was  
36 obtained according to GT IRB H15258. Blood was drawn by median cubital venipuncture  
37 into sodium citrate (3.2%). The sample was subsequently centrifuged at 150 G for 15 min,  
38 and the resulting platelet rich plasma was discarded. Red blood cells were then washed three  
39 times with phosphate buffered saline (PBS). For each wash, 12 mL of PBS were added, the  
40 sample was centrifuged at 1000 RPM for 10 min, and the supernatant was discarded.  
41 Hemolysis was estimated by spinning down experimental RBC samples and measuring the  
42 absorbance of the supernatant at 450 nm. Absorbance values corresponding to 100%  
43 hemolysis came from incubating RBCs with 0.1% Tween-20. Absorbances corresponding to  
44 0% hemolysis came from untreated RBCs.  
45

#### 46 4.1 Figure 3C

1 For bacterial cytotoxicity measurements, 25 uL of antimicrobial peptide (AMP) was  
2 added, pertaining to 7 concentrations ranging between 7.6 nM and 7.6 mM. 20 uL of  
3 bacteria ( $10^7$  CFU/mL) were added, and the sample was filled to 200 uL with LB broth  
4 in PCR tubes. Sample tubes were taped on a plate shaker (250 RPM) incubating at 37 C  
5 for 8 hours. For RBC hemolysis measurements, the same assay was performed, but used  
6 20 uL of donor RBCs instead of bacteria solution.

#### 8 4.2 Figure 3D

9 For bacteria only condition, 5 uL of bacteria ( $10^9$  CFU/mL) were added to 95 uL LB  
10 broth. For bacteria + AMP p<sub>1</sub>, 58 uL of AMP p<sub>1</sub> (1.7 mM) were added to 5 uL of  
11 bacteria ( $10^9$  CFU/mL), with the solution being filled to 100 uL with LB broth. For  
12 bacteria + protease + locked AMP p<sub>1</sub>, 20 uL of TEVp (4 ug/mL) and 58 uL of AMP p<sub>1</sub>  
13 (1.7 mM) were added to 5 uL of bacteria ( $10^9$  CFU/mL), with the solution being filled to  
14 100 uL with LB broth. Samples in PCR tubes were taped to a plate shaker (250 RPM)  
15 incubating at 37 C for 1 hour. Serial dilutions and plating were then performed to  
16 measure viable bacteria concentrations.

#### 17 4.3 Figure 3E

18 Each condition includes 20 uL of the bioprogram (2 uL of PLC, 6 uL D<sub>1</sub>, 6 uL D<sub>2</sub>, 6 uL  
19 D<sub>3</sub>), 20 uL of bacteria, 10 uL of RBCs, 24 uL of locked peptide drug (9 uL of 1.7 mM  
20 AMP p<sub>1</sub> and 15 uL of 0.53 mM AMP p<sub>0</sub>), and 126 uL PBS. The concentration of  
21 bacteria, and the presence of each biocomparator, depends on the experimental  
22 condition (**Fig. 3E**). Samples in PCR tubes were taped to a plate shaker (250 RPM)  
23 incubating at 37 C for 8 hours, followed by dilutions/plating to estimate bacterial  
24 cytotoxicity. The remainder of the sample was spun down by centrifugation and used to  
25 estimate hemolysis.

### 26 5 Nanosensor synthesis and characterization

27 Aminated IONPs were synthesized in house per published protocol<sup>28</sup>. Mass barcode-labelled  
28 substrate peptides synthesized by MIT Core Facility and used for in vivo formulation.  
29 Aminated IONPs were first reacted to the heterobifunctional crosslinker Succinimidyl  
30 Iodoacetate (SIA; Thermo) for 2 hours at room temperature (RT) and excess SIA were  
31 removed by buffer exchange using Amicon spin filter (30 kDa, Millipore). Sulfhydryl-  
32 terminated peptides and Polyethylene Glycol (PEG; LaysanBio, M-SH-20K) were mixed  
33 with NP-SIA (90:20:1 molar ratio) and reacted overnight at RT in the dark to obtain fully  
34 conjugated activity nanosensors. Activity nanosensors were purified on a Superdex 200  
35 Increase 10-300 GL column using AKTA Pure FPLC System (GE Health Care). Ratios of  
36 FITC per IONP were determined using absorbance of FITC (488 nm,  $\epsilon = 78,000 \text{ cm}^{-1}\text{M}^{-1}$ )  
37 and IONP (400 nm,  $\epsilon = 2.07 \times 10^6 \text{ cm}^{-1}\text{M}^{-1}$ )<sup>35,81</sup> measured with Cytation 5 Plate Reader  
38 (Biotek). At this conjugation condition, our resulting formulations have an average of 50  
39 FITC-labelled peptides per nanoparticle core. DLS measurements of activity nanosensors  
40 were done in PBS or mouse plasma at RT using Zetasizer Nano ZS (Malvern).

### 41 6 Urinary Prediction of Blood Clots in Murine Model of Pulmonary Embolism

42 All urinalysis experiments were done in paired setup. Before (4 days prior) onset of  
43 thrombosis, mice were administered with peptide substrate-labelled activity nanosensors (50  
44 ug of IONP per animal). Mice were placed over 96-well polystyrene plates surrounded by an  
45  
46

1 open cylindrical sleeve covered by a weighted petri dish to prevent animals from leaving the  
2 cylinder. Thrombosis, or pulmonary embolism, was initiated by coinjecting 1.75 ug/g b.w  
3 and 0.17 mg/mouse of fibrinogen (0.5 nmol) of rabbit thromboplastin. Animals were left to  
4 urinate for 30 minutes before urine samples were collected. Individual substrates were  
5 quantified by mass spectrometry, which was performed as a service by Syneos Health.  
6

## 7 **7 Statistical Analysis**

8 Statistical analysis was performed using statistical packages included in GraphPad Prism 6.  
9 To assess the significance of increase in signal due to protease cleavage, we used a two-way  
10 ANOVA (without repeated measures) followed by Sidak's multiple comparisons test (**Fig.**  
11 **2B, C, and 3B**). To assess the accuracy of assigning the binary value 0 or 1 to the digits  $p_0$   
12 and  $p_1$  as seen in **Fig. 2E**, two-way paired t-tests were performed between the signal value  
13 from each digit to determine if the signal from one was statistical more prominent than the  
14 other (**Fig. 2E, 4B, C**). A one-way ANOVA followed by Dunnett's multiple comparisons test  
15 was used to compare experimental means to cells only control in **Fig. 3D**. Two-way ANOVA  
16 followed by Sidak's multiple comparisons test used to compare experimental means to  
17 control for bacterial cytotoxicity and RBC hemolysis (**Fig. 3E**).  
18  
19  
20  
21  
22  
23  
24  
25  
26  
27  
28  
29  
30  
31  
32  
33  
34  
35

1 **Supplementary Figure 1**

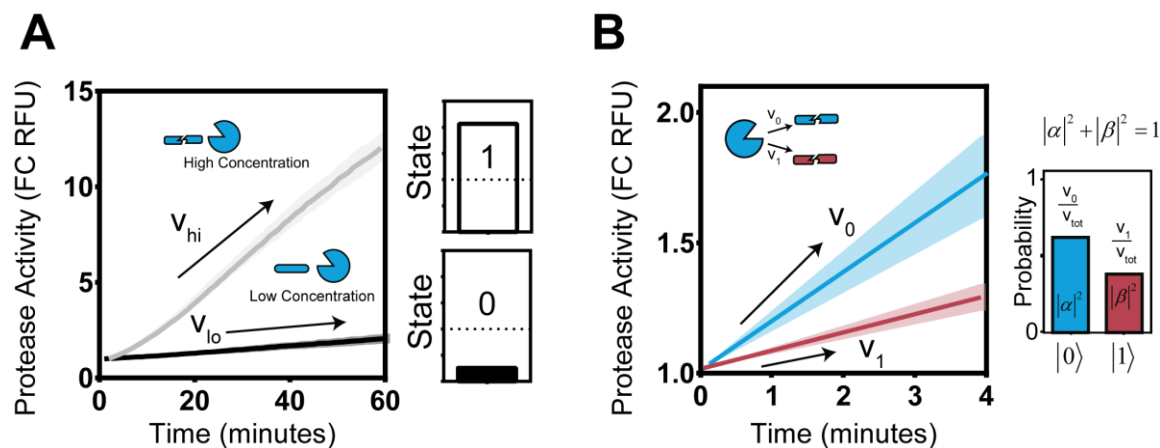

2  
3 **Fig. S1. Extracting bit values from protease cleavage velocity.** (A) Protease (Clr) activity  
4 assay against substrate (LQRIYK), at high and low activities (controlled with concentrations of  
5 protease). Velocity threshold is defined to classically separate state 1 (high activity) from state 0  
6 (low activity). (B) Protease (Plasmin) activity assay against substrate state 0 (GLQRALEI) and  
7 state 1 (KYLGRSYKV). Relative velocities represent the probability of observing the protease  
8 cutting in either state. Line shading represents standard deviation ( $n = 3$ ).



1

## Supplementary Figure 2

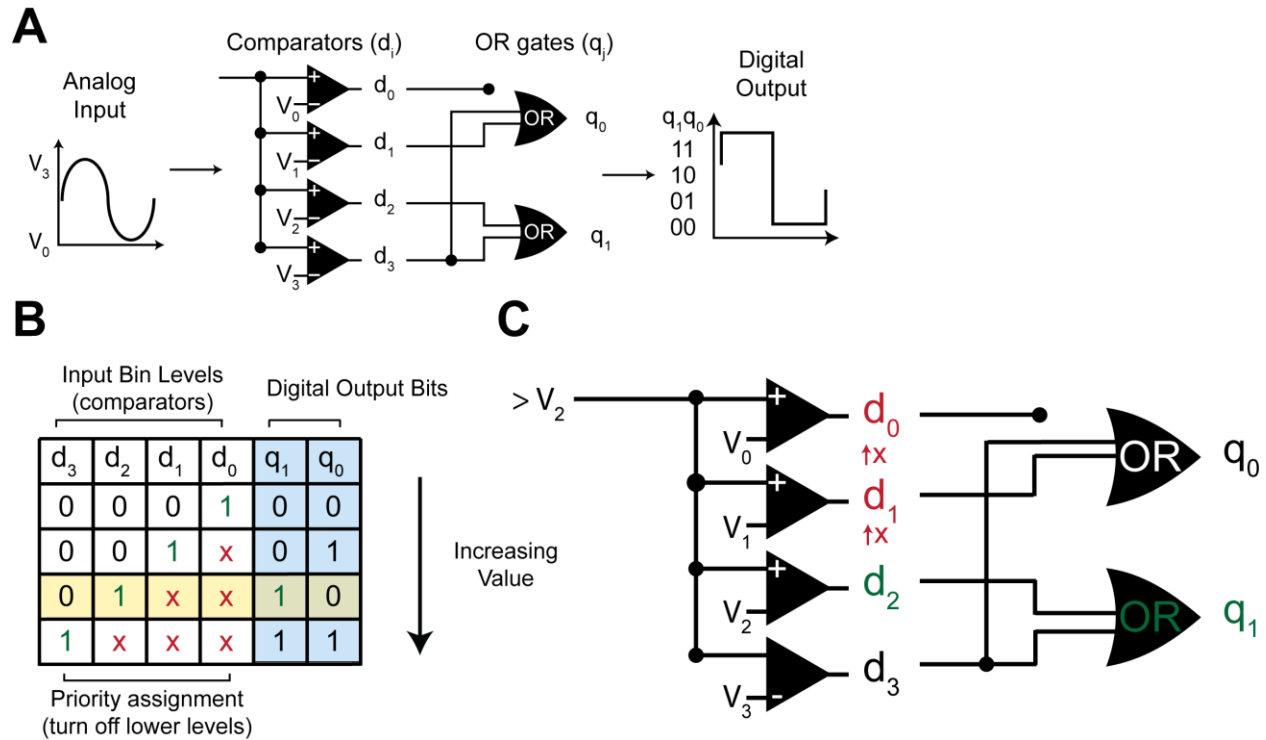

2

3 **Fig. S2. Inputs and outputs of a 4-2 bit ADC.** (A) Circuit diagram of a flash ADC. (B) Truth  
 4 table. Inputs activate continuous subsets of the biocomparators ( $d_0$  to  $d_3$ ). An input which  
 5 activates a biocomparator produces a value of 1. To give this input priority, all biocomparators  
 6 below are turned off, signified by a value of x. Digital output bits are colored blue and  
 7 correspond to the 2-bit output of the ADC. (C) Logic circuit diagram for one example  
 8 input/output case through a 4-2 bit ADC. Input signal  $> V_2$  turns on  $d_0$ – $d_2$ , but priority is given  
 9 to  $d_2$ , which only turns on bit  $q_1$ , producing the output 10.

10

11

12

13

14

15

16

17

18

19

20

21

22

23

24

25



1  
2

### Supplementary Figure 3

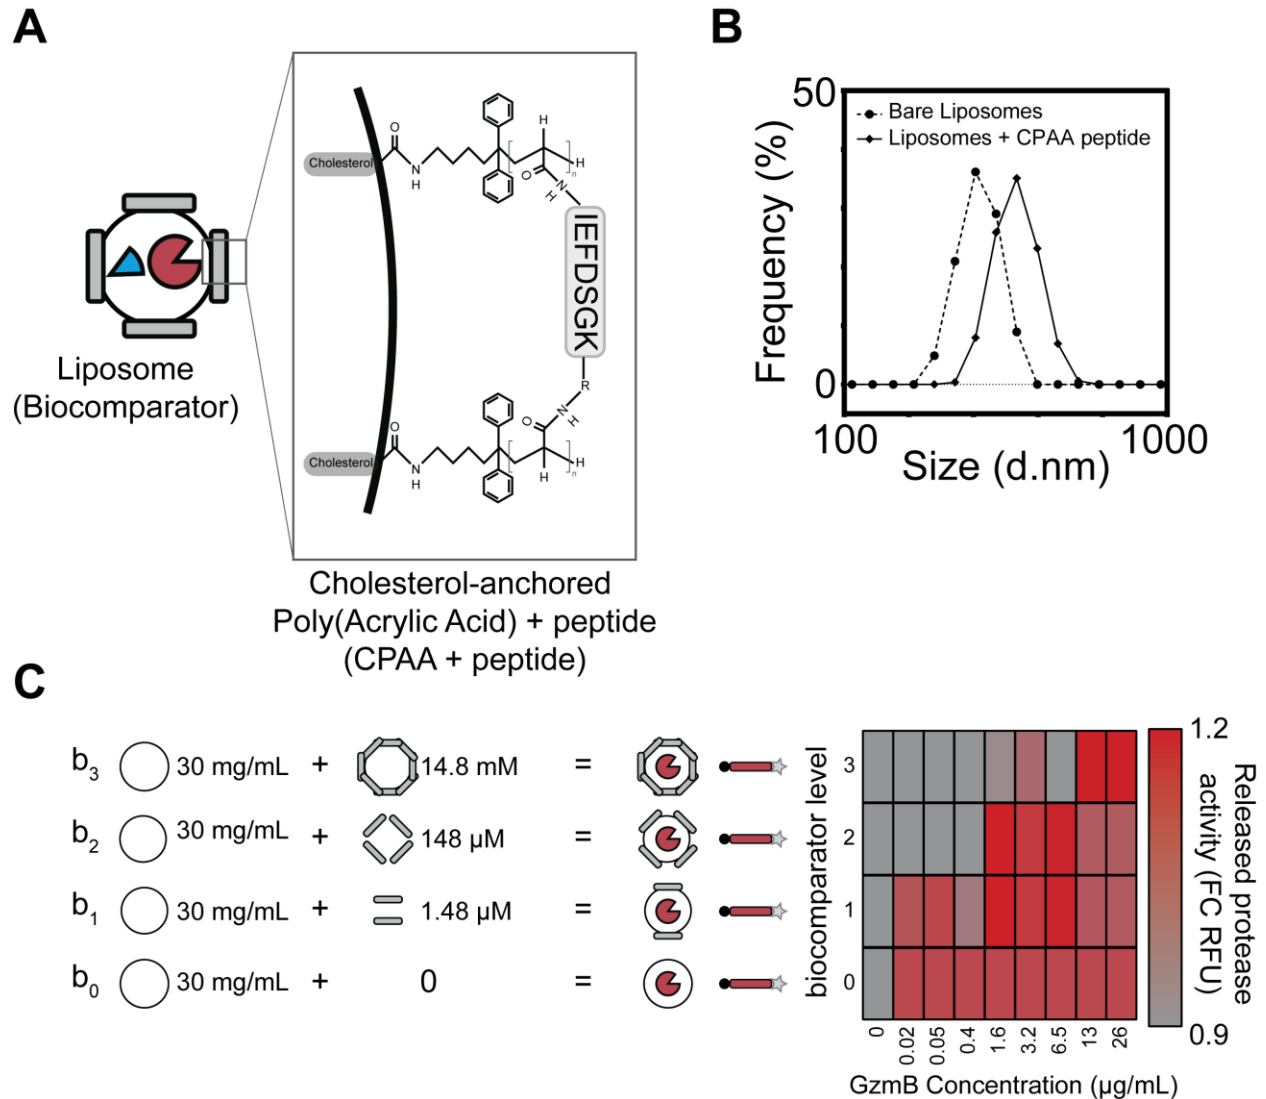

3  
4  
5  
6  
7  
8  
9  
10  
11  
12  
13  
14  
15  
16  
17  
18

**Fig. S3. Peptide caged liposome synthesis and characterization.** (A) Graphic of cholesterol-anchored poly(acrylic acid) (CPAA) embedded in liposome membrane, crosslinked by amine terminated peptides. Carboxylic acid side groups on poly(acrylic acid) are activated by EDC\*MeI. N-terminal amine and C-terminal amine (from lysine side chain) act as primary amines to react with activated CPAA side chains. (B) DLS size measurement of liposomes before and after peptide cage construction. Increase in average hydrodynamic radius from 264.0 nm (bare liposomes) to 344.3 nm (Liposomes + CPAA peptide). (C) Heat map showing concentration of GzmB required to unlock each level. Signal is measured via released protease cutting substrate, normalized to the negative control (0 ug/mL signal protease).

Supplementary Figure 4

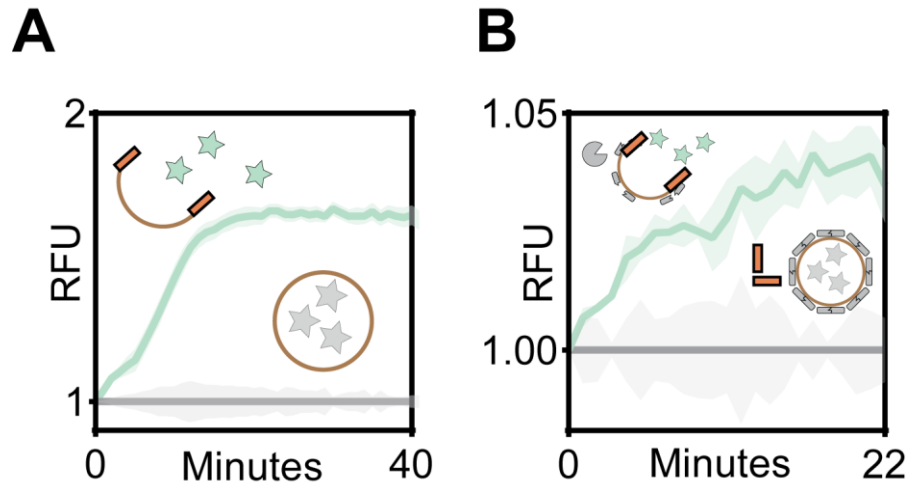

**Fig. S4. Lipase acts as a Buffer gate.** (A) Phospholipase C-triggered release of FITC contained in liposomes. Negative control contains liposome only and no lipase. (B) Phospholipase-C and signal protease GzmB triggered release of FITC. Negative control contains lipase, but no signal protease. Line shading represents standard deviation (n = 3).

1  
2

### Supplementary Figure 5

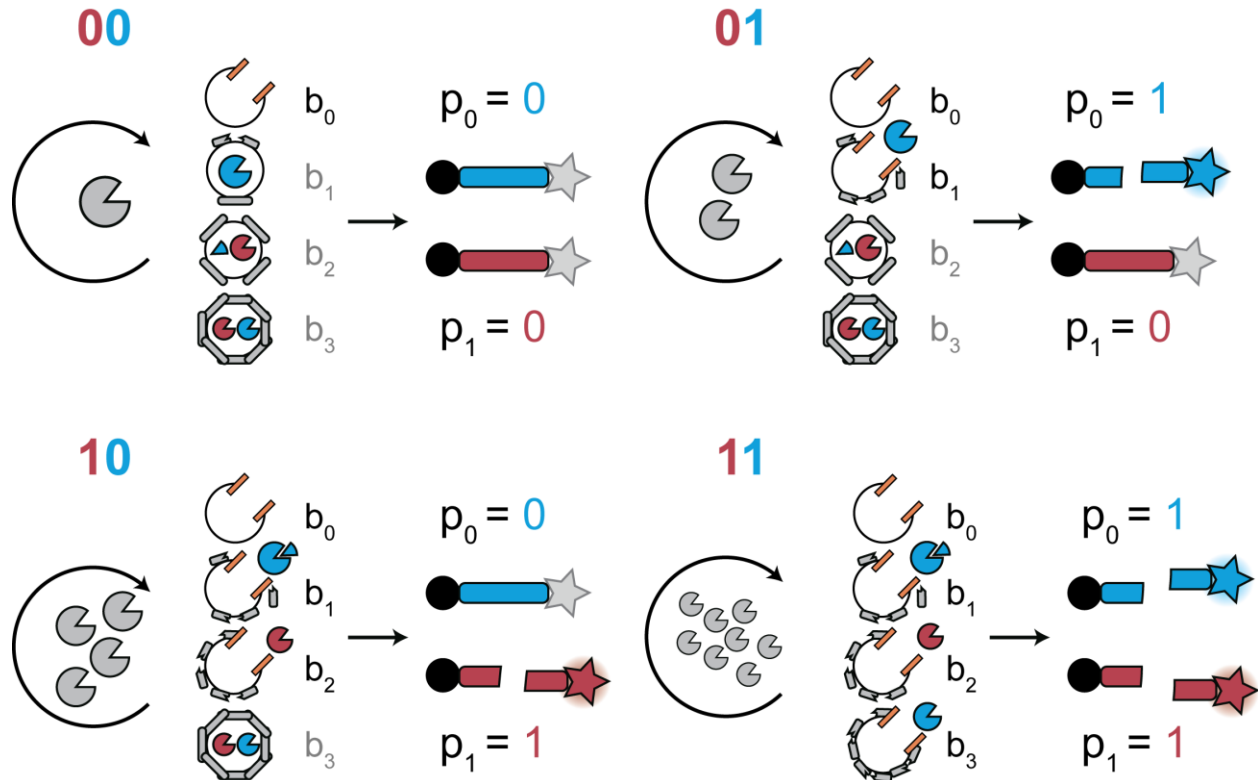

3  
4  
5  
6  
7  
8  
9  
10  
11  
12  
13  
14  
15  
16  
17  
18  
19  
20  
21  
22  
23  
24  
25  
26

**Fig. S5. All possible digital outputs of the bioADC.** Schematic of all 4 possible signal conversions in the biological four-two bit analog-to-digital converter. The signal protease (grey, GzmB), cleaves the peptide cage surrounding bio-comparators. Higher activity levels of GzmB result in more bio-comparator levels being unlocked (b<sub>0</sub> to b<sub>3</sub>). Lipase (orange rectangle) is co-incubated with the bioADC such that all exposed bio-comparators are fully opened via degradation of liposome by phospholipase C. Released signal converter proteases and priority encoding inhibitors interact to produce one digital signal. This signal interacts with OR gates to produce "high", or 1, values for the correct binary digits.

## Supplementary Figure 6

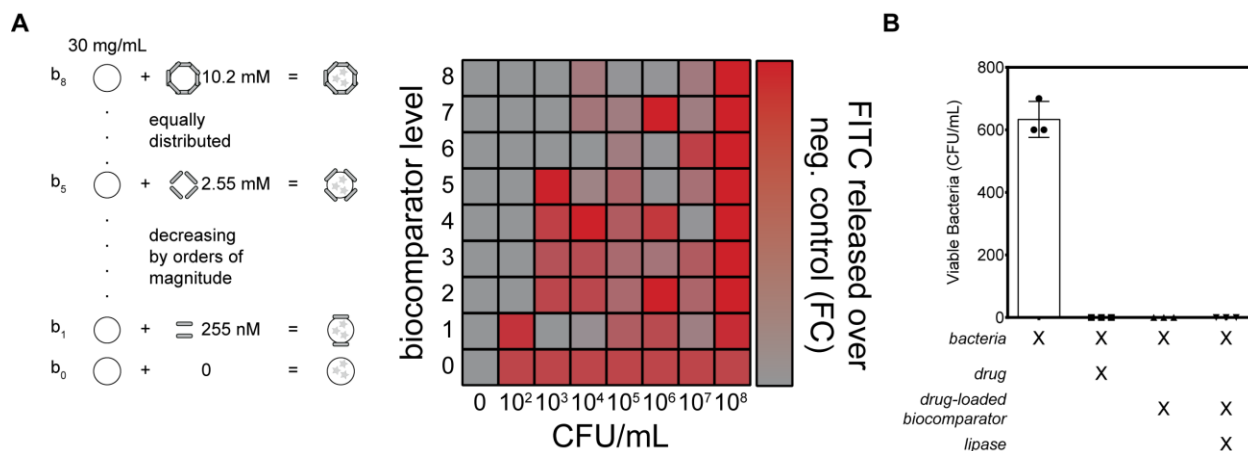

**Fig. S6. Biocomparator and OR gate interface with bacteria.** (A) Unlocking peptide caged liposomes with increasing peptide crosslinking densities (levels 0 – 8). Eight levels of increasing peptide cage crosslinking were used to determine the number of bacteria required to unlock each level. Increased concentration of input protease (OmpT, from *E. coli*) leads to more unlocked levels. (B) Bacterial cytotoxicity measurement of drug-loaded liposomes. Conditions are moving from left to right: Bacteria only control, bacteria plus free drug, bacteria plus drug-loaded liposome without lipase, and bacteria plus drug-loaded liposome with lipase. Samples were incubated with bacteria at 37C for eight hours and plated. CFU were quantified to estimate bacteria viability. Error bars are plotted as standard deviation (n = 3).

1

### Supplementary Figure 7

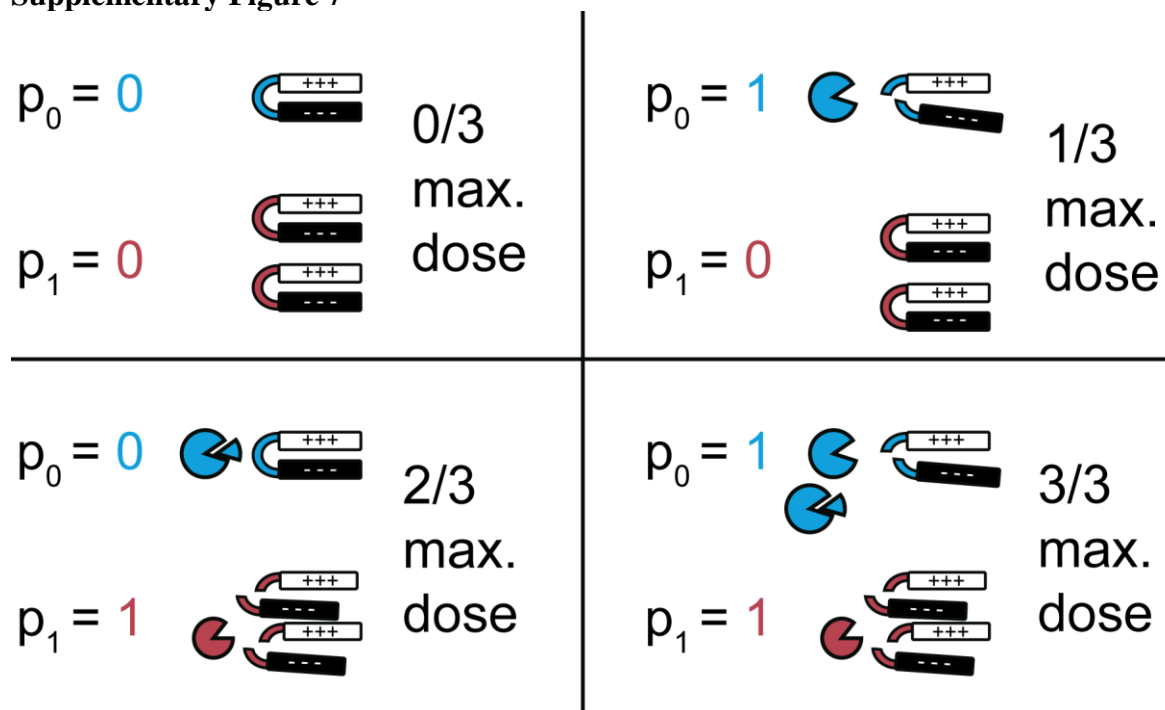

2

3

4

5

6

7

8

9

10

11

12

13

14

15

16

17

18

19

20

21

22

23

24

25

26

27

28

**Fig. S7. All possible drug doses from bioprogram.** The OR gate 0 linked to bit  $p_0$  outputs 1/3 of the available AMP dose, whereas the OR gate 1 linked to bit  $p_1$  outputs 2/3 of the available AMP dose. This translates each digital output to a drug dose increasing by units of 1/3 the total dose.

1

### Supplementary Figure 8

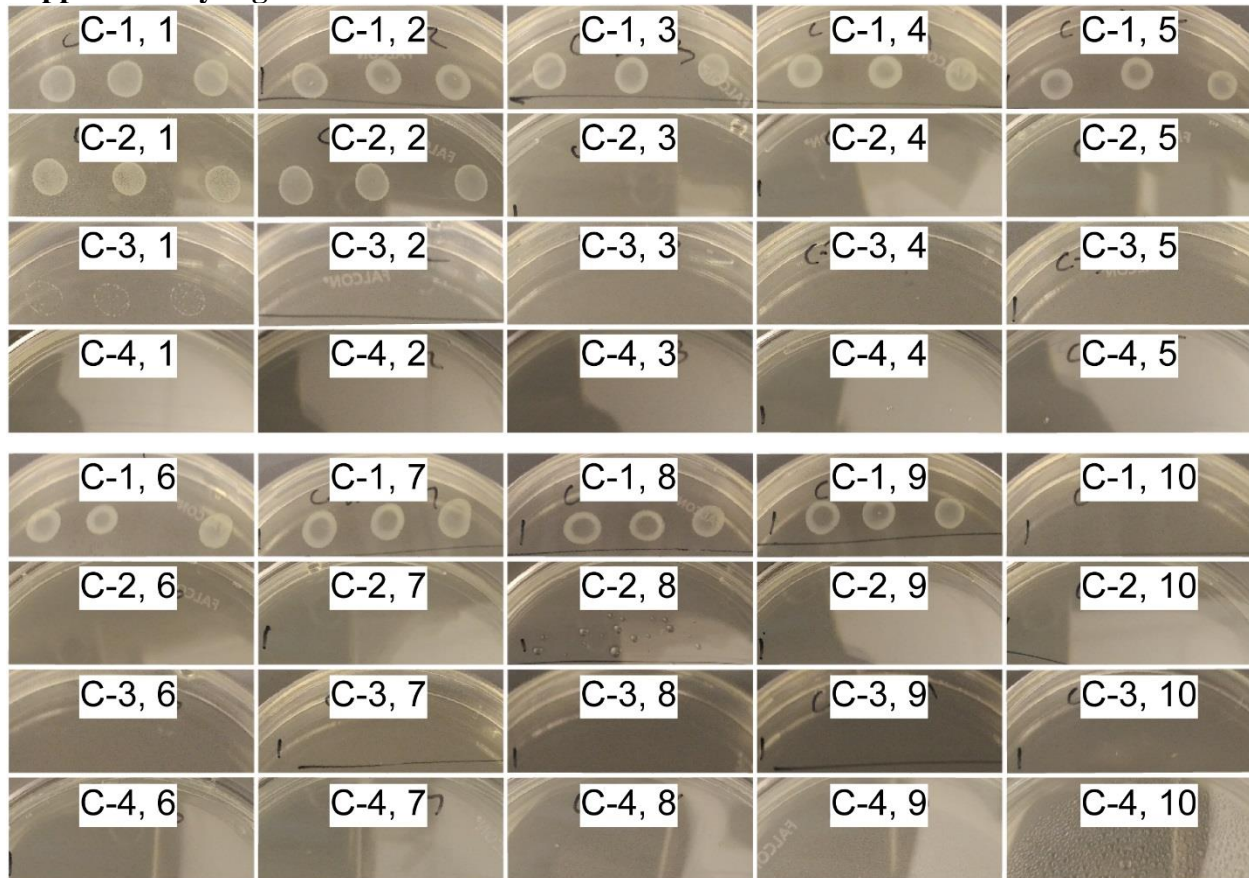

2

3

4

**Fig. S8. Photos of bacterial plates post-incubation with bioprograms.** Photos of bacterial plates used for quantification of cytotoxicity in Fig 3E. C-1 indicates the single, empty comparator bioprogram control, which is defined as 100% cell viability, or 0% cytotoxicity. No colony growth is defined as 0% cell viability, or 100% cytotoxicity. Plates are labeled C-*n* X, where *n* corresponds to the number of biocomparators present in the program combined with infected blood and X corresponds to the concentration of bacteria present. (10 = 10<sup>0</sup> CFU/mL, 9 = 10<sup>1</sup> CFU/mL, 8 = 10<sup>2</sup> CFU/mL, etc.).

11

12

13

14

15

16

17

18

19

20

21

22

23

24

1

## Supplemental Figure 9

**A**

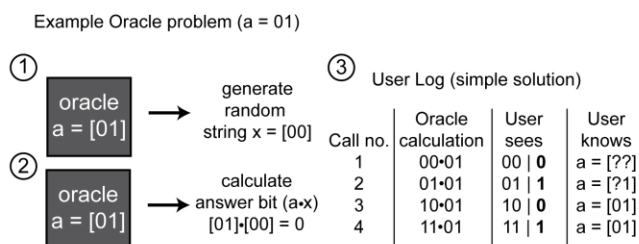

**B**

| Oracle | $b_0$   | $b_1$    | $b_2$   |
|--------|---------|----------|---------|
| 00     | GzmB    | C1r      | Plasmin |
| 01     | GzmB    | Thromb.  | Plasmin |
| 10     | Thromb. | GzmB     | Plasmin |
| 11     | Thromb. | Fac. Xla | Plasmin |

**C**

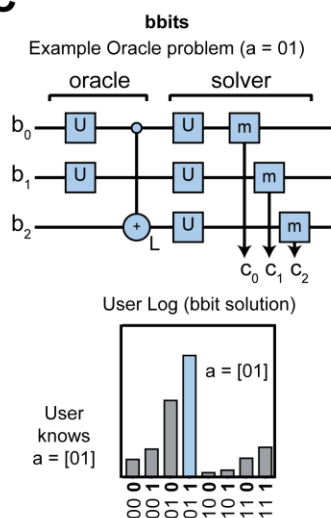

**D**

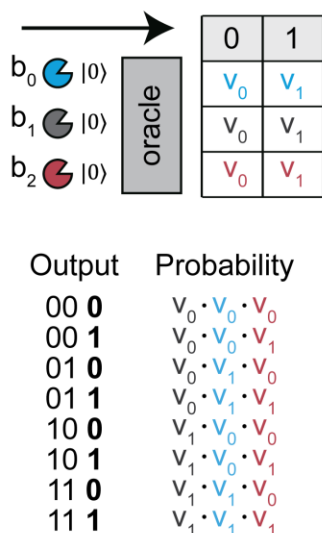

**E**

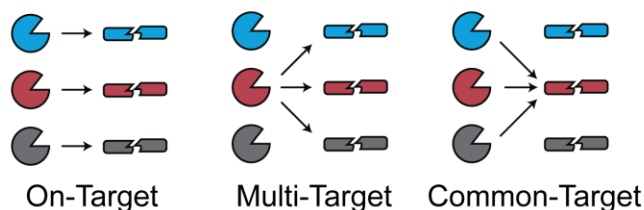

2

3

4

5

6

7

8

9

10

11

12

13

14

15

16

**Fig. S9. Implementing the oracle problem with protease bbits.** (A) For example, Learning Parity with Noise (LPN) is a general inference problem where an oracle (i.e., a black box) is hiding a string of bits, which should be learned with the smallest number of oracle queries. Upon each query, the oracle (1) generates a random string of bits and (2) takes the dot product of the hidden and random strings, which produces the answer bit. Due to the definition of the dot product, each time the answer bit takes on a value of 1, the oracle reveals which digits in the hidden string may also take the value 1 (i.e., which digits in the hidden string exhibit parity with the answer bit), eventually yielding the one correct string. However, in the presence of noise, or uncertainty, the oracle makes mistakes that result in misinformation, making it more difficult to infer the value of the hidden string. A quantum algorithm accounts for this uncertainty by combining the information from all oracle queries to calculate the probabilities that each possible string is the correct one and choosing the string with the highest probability<sup>42</sup>. (B) Table of protease bits used to implement all 4 possible biological oracles. (C) Workflow involved in solving the same example of the two-bit oracle problem using quantum-inspired bbits. Top



1 depicts the biological analog of a quantum score with the orientation of gates and bbits required  
2 to simulate and then solve the Oracle problem. **(D)** Calculating probabilities of all 8 possible  
3 outputs from the 2-bit oracle problem are calculated from multiplying relative cleavage velocities  
4 ( $v_n$ ) of each bbit. **(E)** Schematic demonstrating on-target, multi-target, and common-target  
5 protease activity.  
6  
7  
8  
9  
10  
11  
12  
13  
14  
15  
16  
17  
18  
19  
20  
21  
22  
23  
24  
25  
26  
27  
28  
29  
30  
31  
32  
33  
34  
35  
36  
37  
38  
39  
40  
41  
42  
43  
44  
45  
46

1

## Supplementary Figure 10

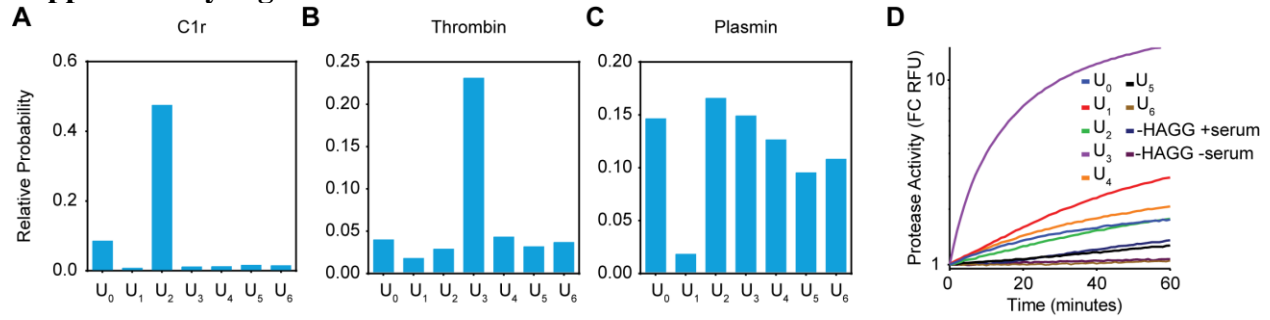

**Fig. S10. Characterizing protease specificity towards U gates.** (A-C) Cleavage assay measuring complement (C1r) and coagulation (Thrombin, Plasmin) protease specificity towards U-gates U<sub>0</sub> to U<sub>6</sub>, panels A to G, respectively. (D) Human serum complement activation assay to measure specificity of proteases in the classical complement cascade towards U-gates U<sub>0</sub> to U<sub>6</sub>.

2

3

4

5

6

7

8

9

10

11

12

13

14

15

16

17

18

19

20

21

22

23

24

25

26

27

28

29

30

31

32

33

34

35

36

37

38

39

1

## Supplemental Figure 11

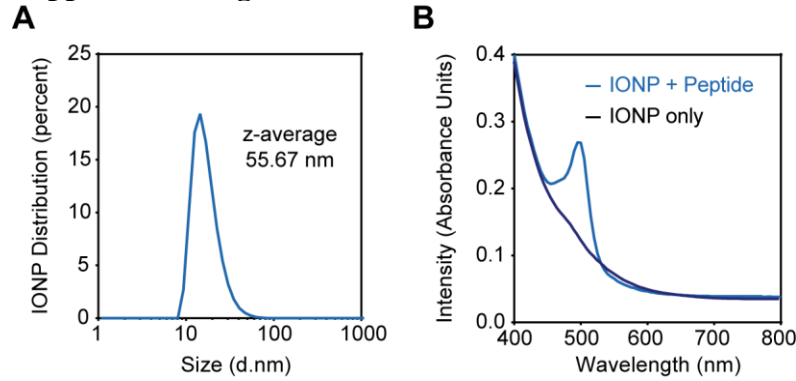

2

3

4

5

6

7

8

9

10

11

12

13

14

15

16

17

18

19

20

21

22

23

24

25

26

27

28

29

30

31

32

33

34

35

36

37

**Fig. S11. Characterizing Iron Oxide Nanoparticles for *in vivo* administration.** (A) Dynamic Light Scattering (DLS) measurement of nanoparticle size distribution. (B) Absorbance spectra for iron oxide nanoparticles (IONP) only and IONP conjugated to a substrate, measured in 5 nm steps from 400 to 800 nm.

1

## Supplementary Figure 12

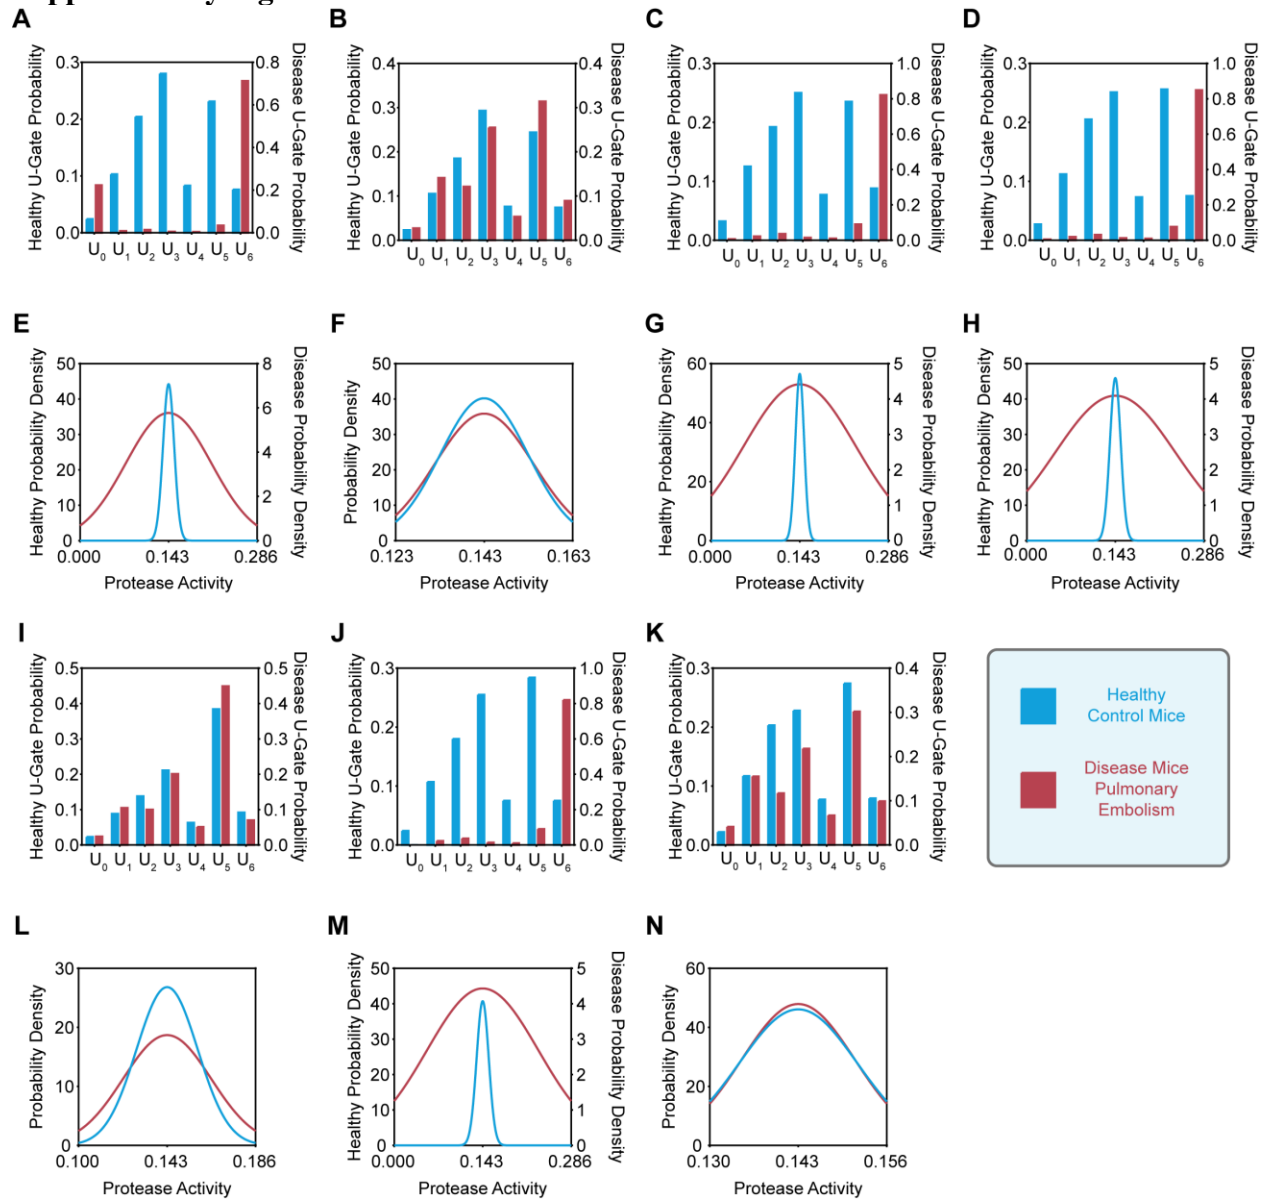

**Fig. S12. Extracting protease activity probabilities with biological "oracle" algorithm. (A—D, I—K)** Relative U-gate probabilities measured via urinalysis of the seven mice before (blue) and after (red) onset of pulmonary embolism (Injection 1). **(E—H, L—N)** Extraction of protease activity probability distribution profiles before (blue) and after (red) onset of pulmonary embolism.

2

3

4

5

6

7

8

9

10

11

12

13

14

15

1

**Table S1**

| <b>Name</b>               | <b>Peptide Sequence*</b>     |
|---------------------------|------------------------------|
| GzmB linker               | IEFDSGK                      |
| GzmBs                     | 5FAM-aIEFDSGK(CPQ2)kkc       |
| WNVs                      | 5TAMRA-RTKR(QXL570)          |
| TEVs                      | 5FAM-ENLYFQG(QXL520)         |
| OmpT linker               | RRSRRVK                      |
| OmpTs                     | DABCYL-RRSRRV-Lys(5-FAM)     |
| Polyarginine AMP          | RRRRRRRR                     |
| Locked AMP p <sub>0</sub> | EEEEEEEEEEERKTRRRRRRRRR      |
| Locked AMP p <sub>1</sub> | EEEEEEEEENLYFQRRRRRRRRRR     |
| CC1                       | 5FAM-LQRIYK-K(CPQ2)-C        |
| CC2                       | 5FAM-KSVARTLLVK-K(CPQ2)-C    |
| CC4                       | 5FAM-QRQRIIGG-K(CPQ2)-C      |
| CC6                       | 5FAM-KYLGRSYKV-K(CPQ2)-C     |
| CC9                       | 5FAM-GLQRALEI-K(CPQ2)-DLys-C |

2

3

4

5

\*Lower-case letters symbolize d-amino acids

6

7

8

9

10

11

12

13

14

15

16

17

18

19

1

**Table S2**

| <b>Protease Name</b>        | <b>Abbreviation</b> | <b>Substrate(s)</b>                          |
|-----------------------------|---------------------|----------------------------------------------|
| Granzyme B                  | GzmB                | IEFDSG, IEFDSGK                              |
| West Nile Virus Protease    | WNVp                | RTKR, inhibitor: undeca-D-ArgNH <sub>2</sub> |
| Tobacco Etch Virus Protease | TEVp                | ENLYFQG                                      |
| Outer Membrane Protein T    | OmpT                | RRSRRV                                       |
| Complement protease C1r     | C1r                 | QRQRIIGG, LQRIYK                             |
| Thrombin                    | Throm.              | KSVARTLLVK, KYLGRSYKV                        |
| Plasmin                     | Plasm.              | GLQRALEI, KYLGRSYKV                          |
| Factor XIa                  | Fac. XIa            | LQRIYK, KYLGRSYKV                            |

2

3

4

5

6

7

8

9

10

11

12

13

14

15

16

17

18

19

20

21

22

23

24

1 **Table S3**

| <b>Substrate Name</b> | <b>Peptide sequence (N terminus on left)</b>                     | <b>Modifications</b>                                                                                                                                  |
|-----------------------|------------------------------------------------------------------|-------------------------------------------------------------------------------------------------------------------------------------------------------|
| U <sub>0</sub>        | e(*aa)(*aa)ndneeGFFsAr(ANP)K(5-FAM)GGLQRIYKC                     | 1st *aa= Gly(13C2); 2nd *aa=Val(U13C5,15N)                                                                                                            |
| U <sub>1</sub>        | eG(*aa)ndneeGF(*aa)s(*aa)r(ANP)K(5-FAM)GGKSVARTLLVKC             | 1st *aa= Val(U13C5,15N); 2nd *aa=Phe(15N); 3rd *aa=Ala(15N)                                                                                           |
| U <sub>2</sub>        | e(*aa)(*aa)ndneeGFFs(*aa)r(ANP)K(5-FAM)GGQRQRIGGC                | 1st *aa= Gly(U13C2,15N); 2nd *aa=Val(15N); 3rd *aa=Ala (U13C3,15N)                                                                                    |
| U <sub>3</sub>        | e(*aa)Vndnee(*aa)FFs(*aa)r(ANP)K(5-FAM)GGKYLGRSYKVC              | 1st *aa= Gly(13C2); 2nd *aa=Gly(13C2); 3rd *aa=Ala(U13C3,15N)                                                                                         |
| U <sub>4</sub>        | eGVndnee(*aa)(*aa)Fs(*aa)r(ANP)K(5-FAM)GGGLQRALEIC               | 1st *aa=Gly(U13C2,15N); 2nd *aa=Phe(15N); 3rd *aa=Ala(U13C3,15N)                                                                                      |
| U <sub>5</sub>        | e(*aa)(*aa)ndnee(*aa)(*aa)(*aa)s(*aa)r(ANP)K(5-FAM)GGKTTGGRIYGGC | 1st *aa=Gly(13C2); 2nd *aa=Val(U13C5,15N); 3rd *aa=Gly(U13C2,15N); 4th *aa=Phe(15N); 5th *aa=Phe(15N); 6th *aa=Ala(15N); still include ANP and K5-FAM |
| U <sub>6</sub>        | eG(*aa)ndnee(*aa)(*aa)Fs(*aa)r(ANP)K(5-FAM)GGQARGGSC             | 1st *aa=Val(U13C5,15N); 2 <sup>nd</sup> *aa=Gly(U13C2,15N); 3rd *aa=Phe(15N); 4th *aa=Ala(U13C3,15N)                                                  |

2
